1           **DNA double-strand breaks induced by reactive oxygen species**  
2                   **promote DNA polymerase IV activity in *Escherichia coli***

3

4   **Sarah S. Henrikus<sup>1,2</sup>, Camille Henry<sup>3</sup>, John P. McDonald<sup>4</sup>, Yvonne Hellmich<sup>5</sup>,**  
5   **Steven T. Bruckbauer<sup>3</sup>, Megan E. Cherry<sup>1,2</sup>, Elizabeth A. Wood<sup>3</sup>, Roger**  
6   **Woodgate<sup>4</sup>, Michael M. Cox<sup>3</sup>, Antoine M. van Oijen<sup>1,2</sup>, Harshad Ghodke<sup>1,2</sup>,**  
7   **Andrew Robinson<sup>1,2\*</sup>**

8   <sup>1</sup>Molecular Horizons Institute and School of Chemistry and Molecular Bioscience, University  
9   of Wollongong, Wollongong, Australia

10   <sup>2</sup>Illawarra Health and Medical Research Institute, Wollongong, Australia

11   <sup>3</sup>Department of Biochemistry, University of Wisconsin-Madison, United States of America

12   <sup>4</sup>Laboratory of Genomic Integrity, National Institute of Child Health and Human  
13   Development, National Institutes of Health, Bethesda, Maryland, United States of America

14   <sup>5</sup>Institute of Biochemistry, Goethe Universität, Frankfurt, Germany

15   \*Corresponding author. Mailing address: School of Chemistry and Molecular Bioscience,  
16   University of Wollongong, Wollongong, NSW 2522, Australia. Email: andrewr@uow.edu.au.

17

18   **Keywords:** *Escherichia coli* / antibiotic / reactive oxygen species / double-strand breaks /  
19   SOS response / DNA polymerase IV / DNA polymerase V

20

21 **Abstract**

22 Under many conditions the killing of bacterial cells by antibiotics is potentiated by  
23 damage induced by reactive oxygen species (ROS). In most bacteria, ROS primarily target  
24 biomolecules such as proteins and DNA. Damage to DNA, particularly in the form of double-  
25 strand breaks (DSBs), is a major contributor to cell death. DNA polymerase IV (pol IV), an  
26 error-prone DNA polymerase produced at elevated levels in cells experiencing DNA  
27 damage, has been implicated both in ROS-dependent killing and in DSB repair (DSBR).  
28 Here, we show using single-molecule fluorescence microscopy that ROS-induced DSBs  
29 promote pol IV activity in two ways. First, exposure to the DNA-damaging antibiotics  
30 ciprofloxacin and trimethoprim triggers an SOS-mediated increase in intracellular pol IV  
31 concentration that is strongly dependent on both ROS and DSBR. Second, in cells that  
32 constitutively express pol IV, co-treatment with a ROS mitigator dramatically reduces the  
33 number of DSBs as well as pol IV foci formed, indicating a role of pol IV in the repair of ROS-  
34 induced DSBs.

35 **Significance**

36 Many antibiotics induce an accumulation of reactive oxygen species (ROS) in  
37 bacterial cells. ROS-induced damage to DNA, in particular formation of double-strand breaks  
38 (DSBs), potentiates killing by several bactericidal antibiotics. Here we used single-molecule  
39 fluorescence microscopy to reveal new links between ROS-induced DSBs and the activity of  
40 error-prone DNA polymerase IV (pol IV). We found that antibiotic-induced up-regulation of  
41 pol IV production requires active formation of DSB intermediates and can be suppressed by  
42 ROS mitigators. The formation of pol IV foci, which reflect DNA-binding events, also requires  
43 DSB repair. Our findings support a major role for pol IV in DSB intermediates and reveal new  
44 details of how antibiotic treatment can potentially drive the development of antibiotic  
45 resistance in bacteria.

46

47 **Main**

48 Many antibiotics induce the accumulation of reactive oxygen species (ROS) within  
49 bacterial cells (1–4). These highly reactive molecules cause widespread damage to  
50 biomolecules. It is becoming clear that secondary DNA lesions induced by ROS, such as  
51 double-strand breaks (DSBs) (5,6) and oxidized nucleotides (7,8), potentiate killing by  
52 bactericidal antibiotics. This phenomenon of secondary lesion formation, which has been  
53 described for several antibiotic classes with different primary modes of action, is known as  
54 the common killing mechanism (8–15). A well-studied model of the common killing  
55 mechanism is the fluoroquinolone antibiotic ciprofloxacin, a DNA gyrase inhibitor, for which  
56 killing is strongly potentiated by ROS accumulation (12). A second well-studied model of the  
57 common killing mechanism is trimethoprim (13), an antibiotic that inhibits folic acid  
58 production and consequently induces thymineless death (TLD). Recent work indicates that  
59 TLD involves the accumulation of ROS, which lead to the formation of DSBs (5).

60 Two mechanisms for ROS-induced DSB formation have been proposed in *E. coli*.  
61 The first invokes oxidization of the cellular nucleotide pool, leading to increased  
62 incorporation of oxidized nucleotide triphosphates (e.g. 8-oxo-dGTP) into the DNA, for  
63 instance, by DNA polymerase IV (7,16). Subsequent initiation of base-excision repair (BER)  
64 creates single-stranded DNA (ssDNA) gaps. In cases where BER is initiated at nearby sites,  
65 DSBs may be formed (7,15,16). Evidence for a second mechanism of ROS-dependent DSB  
66 formation has emerged from a recent mechanistic study of TLD in *Escherichia coli* (5,13).  
67 The ROS-driven potentiation of killing by both antibiotic treatment and TLD can be abrogated  
68 through the addition of ROS mitigators to the culture medium (1,5,12). For example, dimethyl  
69 sulfoxide (DMSO) and 2,2'-bipyridine (BiP), both, effectively mitigate the accumulation of  
70 antibiotic-induced ROS (5,17). Using microscopy to quantify ssDNA gaps and DSBs in cells  
71 undergoing TLD, Hong and co-workers discovered that thymine starvation initially leads to  
72 the accumulation of ssDNA gaps, which are subsequently converted to DSBs in an ROS-  
73 dependent process (5). In cells treated with ROS mitigators, gaps were not converted to  
74 DSBs and thymine starvation was largely abolished (5). For ciprofloxacin, a DNA gyrase

75 inhibitor, a second, ROS-independent pathway exists in which gyrase-stabilized cleavage  
76 complexes dissociate, creating a DSB directly (9–11,18).

77         Several lines of evidence implicate pol IV in ROS-dependent DSB formation and  
78 processing. Pol IV efficiently incorporates 8-oxo-dGTP into DNA *in vitro* (7). Cells over-  
79 expressing pol IV exhibit ROS-dependent lethality (7,16,19). Similarly, cells lacking pol IV  
80 and pol V are partially protected against killing by ampicillin under conditions where ROS  
81 concentrations are increased (7). These observations suggest that pol IV promotes the  
82 formation of DSBs due to the BER-mediated removal of closely spaced 8-oxo-dGTPs  
83 incorporated by pol IV (16). Other studies indicate that pol IV has a role in the repair of DSBs  
84 (20,21,30,31,22–29): First, pol IV physically interacts with the RecA recombinase and RecA  
85 nucleoprotein filaments (RecA\*); a key player in DSB repair (DSBR) (26,32). This interaction  
86 might facilitate pol IV to function in strand exchange (33). Second, fluorescently labelled pol  
87 IV colocalizes with RecA extensively at sites of induced DSBs when expressed from a low-  
88 copy plasmid (27). Similarly, in cells treated with ciprofloxacin, pol IV highly colocalizes with  
89 RecA\* structures (32). Third, genetic studies reveal that the gene encoding pol IV, *dinB*, is  
90 required for both induced and spontaneous error-prone DSBR (20–25). Fourth,  
91 intermediates of DSBR known as recombination D-loops are efficiently utilized as substrates  
92 by pol IV *in vitro* (28,34).

93         Interestingly, the mutagenic potential of pol IV is modulated by UmuD and the  
94 recombinase RecA (26,29–31). UmuD induces error-free synthesis of pol IV (26), promoting  
95 long-lived association of pol IV with the DNA (32). Following UmuD cleavage, pol IV however  
96 operates error-prone (26) and pol IV association with DNA is inhibited (32). Furthermore, pol  
97 IV operates in an error-prone manner in recombination intermediates *in vitro* (29). Error-  
98 prone activity of pol IV in recombination intermediates might be induced due to the  
99 interaction of pol IV with RecA (26,29). Beyond this, RecA promotes DNA synthesis by pol IV  
100 in replisomes *in vitro* (30). In the presence of RecA, pol IV can also bypass alkylation lesions  
101 more efficiently (31). In addition, RecA nucleoprotein formation on single-stranded DNA is a  
102 major trigger for SOS induction and thus increased pol IV expression (35). For some

103 antibiotics, it has however been shown that the SOS response is mostly triggered following  
104 DSB processing by RecBCD (36,37). Notably, upon induction of the SOS response, the  
105 cellular concentration of pol IV increases significantly (38,39). Despite these observations, it  
106 remains unclear if pol IV primarily works in recombination intermediates or in the context of  
107 replisomes in cells.

108 Here, we used single-molecule fluorescence microscopy to investigate whether ROS,  
109 and ROS-mediated DSBs, influence pol IV expression and association with the nucleoid in  
110 cells. We used two antibiotics which alter DNA replication and for which killing is known to  
111 involve ROS generation; ciprofloxacin and trimethoprim (5,12). We further showed that DSB  
112 resection is necessary for the formation of pol IV foci, even in cells expressing high  
113 concentrations of pol IV (constitutive SOS, *lexA51* mutants, here: *lexA*[Def] mutants),  
114 suggesting that pol IV mainly operates on recombination intermediates.

## 115 **Results**

### 116 **ROS potentiate the expression levels and activity of pol IV**

117 We set out to investigate the influence of antibiotic-induced ROS on pol IV activity by  
118 monitoring fluorescently-tagged single pol IV molecules in cells. Toward that objective, we  
119 first compared pol IV expression levels and its dynamic behavior under normal conditions  
120 (no DMSO) and ROS-mitigating conditions (DMSO added) in response to antibiotic  
121 treatment. Cells were treated with i) ciprofloxacin alone, ii) ciprofloxacin and DMSO in  
122 combination, iii) trimethoprim alone or iv) trimethoprim and DMSO in combination (**Fig. 1, SI**  
123 *Appendix*, Fig. 1A).

124 Prior to live-cell imaging, we first established that cells expressing fluorescent protein  
125 fusions of DinB,  $\tau$  (replisome marker) and UmuC (component of DNA polymerase V, pol V)  
126 exhibited wild-type oxidative stress responses upon antibiotic treatment (ciprofloxacin or  
127 trimethoprim) administered either alone or along with the ROS mitigator (DMSO) (*SI*  
128 *Appendix*, Fig. 2). In the presence of ROS, *E. coli* cells induce the peroxide and/or  
129 superoxide stress responses in which expression of superoxide dismutase, alkyl

130 hydroperoxidase and Fe<sup>3+</sup> enterobactin transporter genes are upregulated (reviewed in  
131 (3,4,40–44)). Therefore, we developed an assay to monitor expression of *gfp* from ROS-  
132 regulated and iron-responsive promoters in cells treated with ciprofloxacin, trimethoprim or  
133 hydrogen peroxide (as a control). We further tested if the addition of DMSO suppressed the  
134 accumulation of ROS (*SI Appendix*, Fig. 3, 4, 5). For this purpose, we constructed three  
135 plasmids that express GFP (fast-folding GFP, *sf-gfp* (45)) from the ROS-regulated promoters  
136 of *sodA* (notably regulated by superoxides/redox active compound via SoxRS and by the  
137 iron (Fe<sup>2+</sup>) concentration via Fur (4,41), *SI Appendix*, Fig. 3A), *ahpC* (regulated by OxyR  
138 (4,42,43), *SI Appendix*, Fig. 4A) or *fepD* (regulated by Fur pathway; iron homeostasis (44),  
139 *SI Appendix*, Fig. 5A). Following hydrogen peroxide treatment, the addition of DMSO  
140 reduced the expression of the GFP reporter from the plasmid-based *sodA* and *fepD*  
141 promoters by 30% (30 mM hydrogen peroxide at t = 8 h, *SI Appendix*, Fig. 3C, 4D). This  
142 reduction in GFP signal is not due to DMSO quenching fluorescence (*SI Appendix*, Fig. 6).  
143 Increased expression from the *ahpC* promoter was delayed by ~3 h (30 and 100 mM  
144 hydrogen peroxide, *SI Appendix*, Fig. 4D). For ciprofloxacin-treated cells, the addition of  
145 DMSO reduced expression from the *fepD* promoter by 50% (5, 10, 20 and 40 ng/mL at t = 8  
146 h, *SI Appendix*, Fig. 5B). For trimethoprim-treated cells, the addition of DMSO reduced the  
147 expression from the *ahpC* and *fepD* promoters by 50% (0.1 and 0.3 µg/mL at t = 8 h, *SI*  
148 *Appendix*, Fig. 4B, 5B). Together, these results indicate that (i) ciprofloxacin and  
149 trimethoprim generate ROS in cells (consistent with previous work (5,46)) and (ii) DMSO  
150 reduced the expression from ROS-sensitive promoters, following hydrogen peroxide,  
151 ciprofloxacin and trimethoprim treatment, implying that ROS levels were effectively reduced  
152 by the addition of DMSO.

153       Following antibiotic addition, we recorded time-lapse movies capturing fluorescence  
154 from *Escherichia coli* cells expressing a functional, YPet fusion of the DinB gene from its  
155 native promoter (*SI Appendix*, Fig. 1B, C, Materials and Methods) (39,47). We then  
156 monitored pol IV concentrations by measuring the fluorescence intensity of DinB-YPet within  
157 cells in the presence or absence of DMSO (2% v/v) and monitored DNA binding activities by

158 counting the number of pol IV foci per cell. Treatment with ciprofloxacin resulted in cell  
159 filamentation accompanied by a clear increase in DinB-YPet intensity, indicating an increase  
160 in the intracellular DinB-YPet concentration (seven-fold increase from 140 to 990 DinB-YPet  
161 fluorescence, **Fig. 1A, B**; *SI Appendix*, Fig. 7). In a previous study (39), following  
162 ciprofloxacin treatment, cells exhibited a similar increase in DinB-YPet concentration; an  
163 increase in intracellular DinB-YPet (pol IV) concentrations was measured from  $6 \pm 1$  nM prior  
164 to treatment (standard error of the mean, SE) to  $34 \pm 3$  nM (SE) 180 min after ciprofloxacin  
165 addition. Interestingly, in this present study, we showed that inclusion of DMSO led to a  
166 significant reduction in the expression level of DinB-YPet in ciprofloxacin-treated cells.  
167 DMSO was added at the concentration previously tested (*SI Appendix*, Fig. 3, 4, 5). 180 min  
168 after ciprofloxacin addition, cellular DinB-YPet intensities were only four-fold higher than  
169 basal levels (intensity increase from 100 to 454, **Fig. 1A, B**). This final intensity corresponds  
170 to a concentration of DinB-YPet equalling  $19 \pm 2$  nM (SE, see *Materials and Methods*),  
171 corresponding to a reduction of about 15 nM of ciprofloxacin-induced pol IV. Treatment with  
172 trimethoprim alone led to a significant increase in DinB-YPet fluorescence; 180 min after  
173 trimethoprim addition, the mean fluorescence intensity increased by more than four-fold  
174 (fluorescence intensity increase from 135 to 557, **Fig. 1A, B**), corresponding to a final  
175 intracellular pol IV concentration of  $23 \pm 2$  nM. Inclusion of DMSO led to a significant  
176 reduction in trimethoprim-induced pol IV up-regulation; cellular DinB-YPet fluorescence  
177 intensities increased only slightly from 113 to 209, corresponding to a final pol IV  
178 concentration of  $9 \pm 2$  nM. Thus, for both antibiotics, addition of DMSO resulted in a  
179 significant reduction in the steady state levels of pol IV in response to treatment.

180 Cells exhibit distinct pol IV foci when individual DinB-YPet molecules bind to DNA  
181 and thus experience decreased diffusional mobility (48). Since cells expressing fluorescently  
182 tagged catalytically dead pol IV molecules do not exhibit foci (39), the foci observed in  
183 response to antibiotic treatment represent pol IV molecules engaged in catalytic functions.  
184 Prior to the addition of ciprofloxacin, cells contained on average  $0.6 \pm 0.2$  foci per cell (SE) in  
185 the absence of DMSO, and  $0.4 \pm 0.1$  foci per cell in the presence of DMSO (**Fig. 1C**).

186 Following treatment with ciprofloxacin alone, the number of foci steadily increased. By 180  
187 min, cells had  $4.2 \pm 1.1$  foci per cell. Upon ciprofloxacin-DMSO treatment, cells contained  
188  $1.8 \pm 0.4$  foci per cell; a > 50% reduction compared to ciprofloxacin-alone measurements.  
189 Prior to the addition of trimethoprim, cells contained on average  $0.5 \pm 0.1$  foci (SE) in the  
190 absence of DMSO and  $0.4 \pm 0.1$  foci in the presence of DMSO. Trimethoprim-alone  
191 treatment induced a slight increase in the number of DinB-YPet foci with  $0.9 \pm 0.2$  per cell  
192 (SE) at 180 min. This is lower than the number of foci observed for ciprofloxacin-DMSO  
193 treatment ( $1.8 \pm 0.4$  per cell), despite the measured pol IV concentration being marginally  
194 higher after trimethoprim-alone treatment (**Fig. 1C**). Strikingly, cells treated with both  
195 trimethoprim and DMSO did not show any increase in DinB-YPet foci after trimethoprim  
196 addition ( $0.5 \pm 0.1$  foci per cell at 180 min; **Fig. 1C**). Together, these results demonstrate  
197 that for cells treated with ciprofloxacin or trimethoprim, addition of DMSO suppresses the  
198 drug-induced increases in DinB-YPet concentration, as well as the binding of pol IV to DNA,  
199 as evidenced by a reduction in the number of DinB-YPet foci. Importantly, the concentration  
200 of pol IV and its extent of DNA-binding are not directly correlated as the trimethoprim-alone  
201 and ciprofloxacin-DMSO treatments induced similar DinB-YPet concentrations, but different  
202 numbers of DinB-YPet foci.

### 203 **ROS-induced double-strand breaks trigger the SOS response**

204 Reasoning that the decreased induction of *dinB-YPet* expression in cells co-treated  
205 with DMSO likely resulted from attenuation of the SOS response, we repeated the time-  
206 lapse experiments (*SI Appendix*, Fig. 1B, C) on cells that carried an SOS-reporter plasmid,  
207 in which GFP is expressed from the SOS-inducible *sulA* promoter ( $p_{SulA}$ -*gfp*; fast-  
208 folding GFP, *gfpmut2* (49)). In the absence of any antibiotic treatment, cells exhibit very low  
209 fluorescence intensity, consistent with the repression of the *sulA* promoter in the absence of  
210 exogenously applied DNA damage (**Fig. 2A**, '0 min'). SOS levels were similarly low for cells  
211 grown in the presence of DMSO. Cells exhibited robust SOS induction upon treatment with



212 ciprofloxacin as evidenced by the increase in GFP fluorescence in the 180 min time window  
213 after addition of ciprofloxacin (170 fold induction, **Fig. 2B**). Consistent with our hypothesis,  
214 SOS induction was strongly inhibited upon inclusion of DMSO during ciprofloxacin treatment  
215 (13 fold induction at 180 min; **Fig. 2B**). A similar reduction in ROS and SOS levels has been  
216 observed in cells following co-administration of ciprofloxacin with another ROS mitigator, *N*-  
217 acetylcysteine (50). Cells exposed to trimethoprim exhibited a delay in SOS induction,  
218 however, even in this case, high levels of SOS induction (100 fold induction) were suppressed  
219 by the addition of DMSO (2 fold induction for combined treatment with trimethoprim and  
220 DMSO; **Fig. 2B**). Notably, the addition of a different ROS mitigator, 2,2'-bipyridine (BiP,  
221 0.35 mM, 0.5 x MIC (5)), similarly suppressed the induction of the SOS response (**Fig. 2**).  
222 These results were also confirmed using plate-reader assays (*SI Appendix*, Fig. 8).

223 We reasoned that the suppression of SOS by ROS mitigators might reflect a  
224 reduction in the formation and processing of DSBs. Cells lacking *recB* fail to induce SOS  
225 upon treatment with nalidixic acid, suggesting that end-resection products formed by  
226 RecBCD might be sites of SOS induction (36,37). Since ciprofloxacin and nalidixic acid both  
227 target DNA gyrase (9,11,51), we repeated the GFP reporter measurements in cells lacking  
228 *recB* (SSH111,  $\Delta recB$   $P_{sulA}$ -*gfp*) to determine if SOS induction by ciprofloxacin is also  
229 dependent on DSB processing. The deletion of *recB* strongly inhibited the SOS response  
230 following ciprofloxacin treatment (0.4 fold induction at 180 min in comparison to *recB*<sup>+</sup>, **Fig. 2**,  
231 *SI Appendix*, Fig. 9). While *recB* deletions are known to reduce survival in cells treated with  
232 ciprofloxacin (52), we observed that most cells lacking *recB* continued to grow and divide  
233 during the 180 min time-lapse measurement (*SI Appendix*, Fig. 7, 9), indicating that the lack  
234 of SOS induction observed for ciprofloxacin-treated *recB*-deficient cells did not stem from  
235 gross inhibition of all cellular functions. Plate reader assays did not reveal a sustained  
236 increase in cell mass for *recB* deletion cells following ciprofloxacin treatment (*SI Appendix*,  
237 Fig. 8A, last column), suggesting that the initial growth observed by microscopy stagnates  
238 soon after the 180 min observation window.

239 To more directly investigate if ROS create DSBs following ciprofloxacin and  
240 trimethoprim treatment, we imaged cells expressing a fluorescent fusion of the DSB reporter  
241 MuGam (53) to the photoactivatable mCherry protein (PAmCherry1 (54), *SI Appendix*, Fig.  
242 1A, C). MuGam-PAmCherry was expressed from a plasmid (**Fig. 3A**). For these single-  
243 molecule microscopy experiments, expression of MuGam was induced using 0.003% L-  
244 arabinose at MuGam expression levels that had minimal effects on survival upon drug  
245 treatment (*SI Appendix*, Fig. 10). In the absence of antibiotic, cells exhibited  $0.3 \pm 0.1$   
246 MuGam foci per cell with 74% of cells containing no foci (**Fig. 3b, c**). Two hours after  
247 ciprofloxacin treatment, cells contained increased number of MuGam foci per cell ( $4.9 \pm 0.3$   
248 foci with 1.6% of cells containing no foci, **Fig. 3C**). Consistent with DMSO mitigating ROS,  
249 DMSO addition reduced the number of MuGam foci per cell ( $2.2 \pm 0.2$  foci with 21% of cells  
250 containing no foci, **Fig. 3C**), indicating a significant contribution of ROS to the formation of  
251 DSBs during ciprofloxacin treatment. In agreement with a previous study (5), we observed  
252 that trimethoprim treatment generates DSBs ( $1.9 \pm 0.1$  MuGam foci with 22% of cells  
253 containing no foci, **Fig. 3C**). These DSBs are ROS-induced as the addition of DMSO  
254 prevents the formation of these DSBs ( $0.5 \pm 0.1$  foci with 59% of cells containing no foci,  
255 **Fig. 3C**). In contrast, in a recent study using sub-inhibitory concentrations of ciprofloxacin,  
256 reactive oxygen species do not induce additional DSBs (55).

257 Taken together our measurements indicate that antibiotic-induced ROS generate  
258 DSBs and potentiate the SOS response. Furthermore, SOS induction levels are dependent  
259 on *recB* DSB processing in cells treated with ciprofloxacin. Together the results are  
260 consistent with a model in which the SOS response is triggered or potentiated in antibiotic-  
261 treated cells via ROS-induced DSBs, leading to increased levels of pol IV in cells.

## 262 **Double-strand break resection creates substrates for pol IV**

263 Having established conditions under which ROS create a majority of DSBs in cells as  
264 well as binding sites for pol IV upon antibiotic treatment, we next set out to characterize pol  
265 IV behavior during DSBR in response to antibiotic treatment. To that end, we tested if pol IV

266 primarily forms foci following DSB resection, suggestive of pol IV having a major role in  
267 DSBR. Therefore, we examined the extent of DinB-YPet focus formation in ciprofloxacin and  
268 trimethoprim treated cells, comparing backgrounds that permitted (*recB*<sup>+</sup>) or prevented  
269 ( $\Delta$ *recB*) DSB processing. Additionally, we monitored the formation of DinB-YPet foci while  
270 using DMSO to modulate the number of antibiotic-induced DSBs (**Fig. 3**). To separate  
271 effects on focus formation from effects on DinB-YPet expression, these measurements were  
272 carried out in a *lexA*(Def) background (56) (*dinB-YPet dnaX-mKate2 lexA*[Def]). These cells  
273 constitutively express DinB-YPet at levels consistent with SOS induced levels, even in the  
274 absence of DNA damage (39). To capture DinB-YPet binding events on the time-scale of  
275 seconds, we recorded burst acquisitions of the DinB-YPet signal (300 x 50 ms exposures  
276 taken every 100 ms, *SI Appendix*, Fig. 1A, D).

277 Consistent with the results from our previous study (39), close to zero DinB-YPet foci  
278 were observed in *lexA*(Def) cells in the absence of antibiotic ( $0.08 \pm 0.05$  foci per cell, **Fig.**  
279 **4**). In contrast, *lexA*(Def) cells treated with ciprofloxacin for 60 min exhibited clear foci ( $1.83$   
280  $\pm 0.15$  foci per cell, **Fig. 4B, C**). Co-treatment with ciprofloxacin and DMSO yielded fewer  
281 foci ( $1.02 \pm 0.13$  foci per cell, **Fig. 4 B, C**). The deletion of *recB* resulted in a striking loss of  
282 DinB-YPet foci ( $0.23 \pm 0.05$  foci per cell, **Fig. 4 B, C**). *lexA*(Def) cells treated with  
283 trimethoprim for 60 min contained multiple DinB-YPet foci ( $2.6 \pm 0.18$  foci per cell), whereas  
284 cells treated with both trimethoprim and DMSO contained few foci ( $0.19 \pm 0.06$ ).  
285 Trimethoprim-treated  $\Delta$ *recB* cells also contained very few foci ( $0.14 \pm 0.05$ ). Similar effects  
286 were observed in *lexA*<sup>+</sup> cells, although reductions in focus formation were conflated with  
287 reductions in DinB-YPet expression levels (**Fig. 1C**). Taken together these results  
288 demonstrate that pol IV is normally active at ROS-induced, RecBCD-processed DSBs in  
289 cells treated with ciprofloxacin or trimethoprim. Consistent with this, we have demonstrated  
290 that pol IV co-localizes with RecA\* features in cells treated with ciprofloxacin (32).

291 In a previous study (39), we showed that pol IV primarily forms foci away from  
292 replisomes, indicating that pol IV has a minor role in facilitating replication restart of stalled  
293 replisomes. To investigate if these non-replisomal pol IV foci are ROS-induced, we next

294 determined the percentage of DinB-YPet foci that form in the vicinity of replisomes  
295 (fluorescent protein fusion of the pol III  $\tau$ -subunit,  $\tau$ -mKate2). For each experiment, when  
296 recording the DinB-YPet signal in *recB*<sup>+</sup> cells, we also recorded the position of  $\tau$ -mKate2 as  
297 in the previous study (39). Ciprofloxacin treatment, which rapidly halts DNA synthesis  
298 (57,58), causes 10% of pol IV foci to bind near replisomes (39). Here we observed that the  
299 inclusion of DMSO dramatically increased the relative colocalization of DinB-YPet with  
300 replisomes in both *lexA*<sup>+</sup> and *lexA*(Def) cells treated with ciprofloxacin (*SI Appendix*, Fig. 11,  
301 12). For long-lived pol IV foci (detectable within a 10 s average projection image, **Fig. 5B**,  
302 right panel) in the *lexA*(Def) background, 80% of foci colocalized with replisomes under  
303 ciprofloxacin-DMSO conditions (**Fig. 5B**). This is consistent with the addition of DMSO  
304 having removed the vast majority of non-replisomal substrates for pol IV-dependent DNA  
305 synthesis. This observation appears to be consistent with a recent proposal that ROS-  
306 mitigation reduces rates of pol IV-dependent mutagenesis (55). For *lexA*(Def) cells treated  
307 with trimethoprim, addition of DMSO abolished long-lived pol IV foci entirely (**Fig. 5A, C**).

### 308 **ROS do not promote pol V activity**

309 Finally, we explored if ROS-induced DSBs promote a change in the binding activity of  
310 the other major error-prone polymerase pol V (UmuD<sub>2</sub>C) in real time (59). Since pol V is  
311 also a member of the SOS regulon (35), we use a *lexA*(Def) background (RW1286, *umuC*-  
312 *mKate2 dnaX-YPet lexA*[Def]) to separate effects on focus formation from effects on UmuC-  
313 mKate2 expression.

314 UmuC foci might form at two stages during the activation of pol V Mut at RecA\*  
315 filaments and when active pol V Mut complexes synthesize DNA. As before, *lexA*(Def) cells  
316 were treated for 60 min with ciprofloxacin-alone, ciprofloxacin-DMSO, trimethoprim-alone or  
317 trimethoprim-DMSO (*SI Appendix*, Fig. 1A). Burst acquisitions of the UmuC-mKate2 signal  
318 were recorded (*SI Appendix*, Fig. 1D, 300 x 50 ms exposures taken every 100 ms).

319 Few UmuC-mKate2 foci were observed in the absence of antibiotic in *lexA*(Def) cells  
320 (about  $0.32 \pm 0.08$  foci per cell, *SI Appendix*, Fig. 12). In *lexA*(Def) cells treated with

321 ciprofloxacin or trimethoprim for 60 min, foci were clearly visible (ciprofloxacin:  $1.24 \pm 0.16$   
322 foci per cell; trimethoprim  $1.39 \pm 0.21$  foci per cell). In both cases, co-treatment with DMSO  
323 had little effect on the number of UmuC-mKate2 foci (ciprofloxacin-DMSO:  $0.99 \pm 0.12$  foci  
324 per cell; trimethoprim-DMSO  $1.26 \pm 0.16$  foci per cell) or on the overall levels of UmuC-  
325 mKate2 fluorescence in the cells. Thus in contrast to the effects observed for pol IV, the  
326 addition of DMSO had little effect on the formation of UmuC foci. Interestingly, in *lexA*<sup>+</sup> cells,  
327 which express SOS normally, trimethoprim treatment (with or without DMSO) did not lead to  
328 the formation of pol V (*SI Appendix*, Fig. 13A, C). Consistent with this, cleavage of UmuD to  
329 UmuD' was far less efficient in trimethoprim-treated cells than in ciprofloxacin-treated cells  
330 (compare *SI Appendix*, Fig. 14B, D). This suggests that RecA\* structures that induce SOS  
331 (i.e. increase in the expression levels of SulA and pol IV) may be different from those that  
332 mediate the formation of pol V through UmuD cleavage. This result is discussed further  
333 below and warrants further investigation.

## 334 **Discussion**

### 335 **ROS-mediated DSBs induce high intracellular concentrations of pol IV**

336 We observed that ROS mitigators reduced levels of SOS induction, and thus, pol IV  
337 concentrations, adding to a growing body of evidence linking ROS and mutational resistance  
338 to antibiotics (14,50,60,61). ROS mitigators reduced the number of MuGam foci per cell,  
339 indicative of fewer DSBs being formed. ROS accumulation is a major trigger for SOS  
340 induction in trimethoprim treated cells and is mediated through RecBCD-dependent  
341 resection of ROS-induced DSBs. When a ROS mitigator is including during treatment, the  
342 SOS response is not induced even though ssDNA regions are likely to be generated by  
343 trimethoprim-induced TLD (5,62,63). Thus, the formation of double-strand breaks is essential  
344 for SOS induction in trimethoprim-treated cells. During thymine starvation, ssDNA regions  
345 are converted to DSB due to ROS activity (5). Our results indicate that a similar pathway is  
346 at play in trimethoprim-treated cells as previously proposed (5).

347 In ciprofloxacin-treated cells, the deletion of *recB* almost fully inhibited the SOS  
348 response. Ciprofloxacin and nalidixic acid both target DNA gyrase (9,11,51). It was  
349 previously observed that induction of SOS by the antibiotic nalidixic acid was completely  
350 blocked in cells that carried a *recB* mutation and were therefore incapable of processing  
351 DSBs through the RecBCD end-resection nuclease complex (36,37). This implies that SOS  
352 induction is also primarily triggered by DSB processing in nalidixic acid-treated cells.  
353 Consistent with this result, we showed here that the SOS response in ciprofloxacin-treated  
354 cells is *recB*-dependent, consistent with a requirement for DSB processing. Cells lacking  
355 *recB* still exhibit very low levels of SOS induction, which could arise from RecA structures  
356 assembled on ssDNA regions or by alternative DSB end-resection pathways, for instance *via*  
357 a RecJ-dependent pathway proposed previously (64,65)

358 Our findings raise the question of whether ssDNA gaps truly represent the major  
359 source of SOS induction in *E. coli*. Under our conditions, DSB processing – most often  
360 induced by ROS – acts as the major trigger of the SOS response. The results presented  
361 here highlight a need that further studies are necessary to fully understand the regulation of  
362 the SOS response, in particular the role RecA\* structures formed on ssDNA gaps versus  
363 DSBs (54,66–68). The observation by Hong *et al.* that ssDNA gaps are converted to DSBs  
364 under conditions of thymine starvation (5), highlights ROS-dependent gap-to-break  
365 conversion as a potential complicating factor in studies that seek to differentiate events that  
366 take place at gaps from those that take place at breaks.

### 367 **DSB processing is critical for the formation of pol IV foci**

368 We showed that the processing of ROS-induced DSBs promotes DinB-YPet focus  
369 formation. The observations are consistent with a model in which ROS-induced DSBs  
370 promote pol IV activity by inducing the SOS response and by generating substrates for pol  
371 IV in the form of recombination intermediates.

372 Few DinB-YPet foci were observed in cells treated with a combination of trimethoprim  
373 and DMSO. Based on events that occur during the analogous process of TLD (5,62),

374 treatment with trimethoprim should induce the formation of ssDNA gaps in the wake of the  
375 replisome. In the presence of ROS these would be rapidly converted to DSBs, whereas  
376 under ROS mitigated conditions the gaps would persist. The low extent of focus formation  
377 observed under trimethoprim-DMSO conditions implies that pol IV rarely acts at these  
378 ssDNA gaps.

379       Following ciprofloxacin treatment, cells exhibited reduced numbers of DinB foci under  
380 low ROS conditions. However, ciprofloxacin also induces the formation of end-stabilized  
381 DNA-gyrase complexes, which halt DNA synthesis, slowing down cell growth (57,58). When  
382 deleting *recB*, and thus blocking DSB resection at both ROS-induced and ROS-independent  
383 DSBs, cells exhibited a very low number of DinB foci, equivalent to numbers present in the  
384 absence of damage. Moreover, the colocalization of DinB-YPet with replisomes was  
385 substantially increased in the presence of DMSO. It is possible that replisome-proximal  
386 DinB-YPet foci, that are insensitive to ROS, reflect pol IV molecules that are recruited to  
387 replisomes that have stalled at end-stabilized DNA-gyrase complexes.

388

### 389 **Pol V is not activated by ROS-induced damage**

390       In contrast to the observations made for pol IV, mitigation of ROS produces only a  
391 marginal effect on pol V levels in ciprofloxacin-treated cells. Pol V levels barely increase  
392 following trimethoprim treatment. Thus unlike pol IV, the repair of ROS-induced DSBs does  
393 not directly lead to increased levels of pol V. One possibility is that the mechanisms of SOS  
394 induction are different during trimethoprim and ciprofloxacin treatments, with the RecA\*  
395 structures formed during trimethoprim treatment being insufficient for the up-regulation of pol  
396 V. A second and perhaps more likely possibility is that the RecA\* structures that trigger LexA  
397 cleavage (and thus SOS induction) are different from those that trigger UmuD cleavage (and  
398 thus pol V activation). In this scenario, ciprofloxacin treatment may produce both types of  
399 RecA\* structure, whereas trimethoprim induces only the form competent for SOS induction.  
400 In this case, poor cleavage of UmuD would be expected to prevent the accumulation of

401 UmuC due a previously identified system of targeted proteolysis, which limits UmuC  
402 accumulation in the absence of UmuD<sub>2</sub> (69).

403 Interestingly, the formation of pol V foci was not affected by adding DMSO to suppress  
404 DSB formation. This implies that DSBR intermediates are not major substrates for pol V in  
405 ciprofloxacin- or trimethoprim-treated cells. In a previous study, we observed that pol V  
406 rarely colocalizes with replisomes (47). Together our observations hint at a potential division  
407 of labor between pols IV and V, with pol IV often acting at DSBR intermediates and pol V  
408 acting at other, as yet unidentified structures, which may include ssDNA gaps or daughter  
409 strand gap repair intermediates.

## 410 **Materials and Methods**

### 411 *Strain construction*

412 EAW102 is *E. coli* K-12 MG1655  $\Delta recB$  and was constructed using  $\lambda_{RED}$   
413 recombination. The kanamycin resistance marker in EAW102 was removed via FLP-FRT  
414 recombination (70) using the plasmid pLH29 to obtain kanamycin sensitive HG356.

415 SSH091, SSH111 and MEC030 (*dinB*<sup>+</sup> *lexA*<sup>+</sup> *recB*<sup>+</sup> + pUA66-*sulA*-gfp, *dinB*<sup>+</sup> *lexA*<sup>+</sup>  
416  $\Delta recB::FRT$  + pUA66-*sulA*-gfp and *recA730* *sulA*<sup>-</sup> + pUA66-*sulA*-gfp) were created by  
417 transforming MG1655, EAW102 and EAW287 with pUA66-*sulA*-gfp (49).

418 RW1286 is *E. coli* MG1655 *umuC-mKate2 dnaX-YPet sulA*<sup>-</sup>::kan<sup>R</sup> *lexA51(Def)*::Cm<sup>R</sup>  
419 and was made in two steps: first the wild-type *sulA*<sup>+</sup> gene of EAW282 was replaced with  
420 *sulA*<sup>-</sup>::kan by P1 transduction from EAW13 (47), to create EAW282 *sulA*<sup>-</sup>; then *lexA51(Def)*  
421 *malB*::Tn9 was transferred from DE406 (71) into EAW282 *sulA*<sup>-</sup> by P1 transduction, selecting  
422 for chloramphenicol resistance. To confirm the presence of the *lexA(Def)* genotype, colonies  
423 were then screened for high levels of RecA expression by Western blotting with anti-RecA  
424 antibodies (72).

425 EAW1144 is *E. coli* K-12 MG1655 *dinB-YPet dnaX-mKate2 sulA*<sup>-</sup> *lexA51(Def)*  $\Delta recB$   
426 and was constructed in three steps: *sulA*<sup>-</sup> FRT-Kan-FRT was P1 transduced in EAW643



427 (KanS) using a P1 lysate grown on EAW13 to obtain the strain EAW1134. The Kan cassette  
428 was removed using pLH29(70). Then, *lexA51(Def) malB::Tn9* was transduced into  
429 EAW1134 using a P1 lysate grown on DE406 to obtain the strain EAW1141. Finally,  $\Delta recB$   
430 FRT-KanR-FRT was transduced into EAW1141 using P1 lysate grown on EAW102 to obtain  
431 EAW1144. All mutations introduced were confirmed by PCR.

432 The pBAD-*MuGam* vector (pEAW1159) was constructed using a PCR-amplified  
433 *muGam* gene fragment (us=GGATATCCATATGGCTAAACCAGCAAACGTA consisting of  
434 a *NdeI* site and the beginning of the *muGam* gene, and MuGam ds=  
435 GCGAATTCTTAAATACCGGCTTCCTGTTC consisting of an *EcoRI* site and the end of the  
436 *muGam* gene) from EAW727 (MG1655 Founder (73)  $\Delta e14$  with chromosomal *muGam-gfp* in  
437 the *attTn7* site). EAW727 was constructed by transducing *muGam-gfp* into Founder  $\Delta e14$   
438 using a P1 lysate grown on SMR14350 (53). The PCR product was digested with *NdeI* and  
439 *EcoRI* and inserted into pBAD *NdeI* which was cut with the same enzymes. pBAD *NdeI* is  
440 pBAD/Myc-HisA (Invitrogen) that has been mutated to add a *NdeI* site in place of the original  
441 *NcoI* site. All other *NdeI* sites were filled in before the mutagenesis. The resulting plasmid  
442 was directly sequenced to confirm presence of wt *muGam* gene

443 The pBAD-*MuGam-PAmCherry* vector (pEAW1162) was constructed by using two  
444 PCR fragments: 1. *NdeI*-MuGam-linker-*EcoRI* generated from pEAW1159 using the  
445 following PCR primers: MuGam us=GGATATCCATATGGCTAAACCAGCAAACGTA  
446 consisting of a *NdeI* site and the beginning of the *muGam* gene, and MuGam ds no stop  
447 link=  
448 GGATATCGAATTCGCCAGAACCAGCAGCGGAGCCAGCGGAAATACCGGCTTCCTGTTC  
449 AAATG consisting of an *EcoRI* site, an 11aa linker, and the end of the *muGam* gene without  
450 a stop codon. The PCR product was digested with *NdeI* and *EcoRI*. 2. *EcoRI*-PAmCherry-  
451 *HindIII* generated from pBAD-*PAmCherry-mCl* (54) using the following PCR primers  
452 PAmCherry usEco = GGATATCGAATTCATGGTGAGCAAGGGCGAGGAG consisting of an  
453 *EcoRI* site and the beginning of mCherry, and PAmCherry dsHind=  
454 GGATATCAAGCTTTTACTTGTACAGCTCGTCCAT consisting of a *HindIII* site and the end

455 of the *mCherry* gene. The PCR product was digested with *EcoRI* and *HindIII*. Both PCR  
 456 products were ligated to pBAD *NdeI* that had been digested with *NdeI* and *HindIII*. The  
 457 resulting plasmid was directly sequenced to confirm the presence of *muGam-PAmCherry*.

458 **Table 1. Strains used in this study.**

| Strain                         | Relevant Genotype                                                                                          | Parent strain                  | Source/technique                                                           |
|--------------------------------|------------------------------------------------------------------------------------------------------------|--------------------------------|----------------------------------------------------------------------------|
| MG1655                         | <i>dinB<sup>+</sup> dnaX<sup>+</sup> recB<sup>+</sup> lexA<sup>+</sup></i>                                 | -                              | published (74)                                                             |
| EAW102                         | $\Delta recB::Kan^R$                                                                                       | MG1655                         | Lambda Red recombination                                                   |
| HG356                          | $\Delta recB::FRT$                                                                                         | MG1655                         | EAW102                                                                     |
| SSH091                         | <i>dinB<sup>+</sup> lexA<sup>+</sup> recB<sup>+</sup> + pUA66-sulA-gfp</i>                                 | MG1655                         | Transformation of MG1655 with pUA66- <i>P<sub>sulA</sub>-gfp</i> (49)      |
| SSH111                         | <i>dinB<sup>+</sup> lexA<sup>+</sup> <math>\Delta recB::FRT</math> + pUA66-<i>P<sub>sulA</sub>-gfp</i></i> | HG356                          | Transformation of HG356 with pUA66- <i>P<sub>sulA</sub>-gfp</i> (49)       |
| EAW18                          | $\Delta dinB::Kan^R$                                                                                       | MG1655                         | published (39)                                                             |
| RW120                          | <i>recA<sup>+</sup> sulA<sup>-</sup> lexA<sup>+</sup> <math>\Delta umuDC::Cm^R</math></i>                  | RW118                          | published (75)                                                             |
| RW546                          | <i>recA<sup>+</sup> sulA<sup>-</sup> lexA51(Def) <math>\Delta umuDC::Cm^R</math></i>                       | RW542                          | published (76)                                                             |
| RW880                          | $\Delta umuDC::Cm^R$                                                                                       | MG1655                         | Transduction of MG1655 with P1 grown on RW120 (75)                         |
| JJC5945                        | <i>dnaX-YPet::Kan<sup>R</sup></i>                                                                          | MG1655                         | published (47)                                                             |
| EAW642                         | <i>dnaX-mKate2::Kan<sup>R</sup></i>                                                                        | MG1655                         | published (39)                                                             |
| EAW633                         | <i>dinB-YPet::Kan<sup>R</sup></i>                                                                          | MG1655                         | published (39)                                                             |
| EAW643                         | <i>dinB-YPet::FRT dnaX-mKate2::Kan<sup>R</sup></i>                                                         | EAW633                         | published (39)                                                             |
| EAW191                         | <i>umuC-mKate2::Kan<sup>R</sup></i>                                                                        | MG1655                         | published (47)                                                             |
| EAW282                         | <i>umuC-mKate2::FRT dnaX-YPet::Kan<sup>R</sup></i>                                                         | JJC5945                        | published (47)                                                             |
| EAW13                          | <i>sulA::Kan<sup>R</sup></i>                                                                               | MG1655                         | published (47)                                                             |
| EAW282 <i>sulA<sup>-</sup></i> | <i>umuC-mKate2::FRT dnaX-YPet::FRT sulA::Kan<sup>R</sup></i>                                               | EAW282                         | Transduction of EAW282 with P1 grown on EAW13 (47)                         |
| RW1286                         | <i>umuC-mKate2::FRT dnaX-YPet::FRT sulA::Kan<sup>R</sup> lexA51(Def)::Cm<sup>R</sup></i>                   | EAW282 <i>sulA<sup>-</sup></i> | Transduction of EAW282 <i>sulA<sup>-</sup></i> with P1 grown on DE406 (71) |
| RW1594                         | <i>dinB-YPet dnaX-mKate2 sulA::Kan<sup>R</sup> lexA51(Def)::Cm<sup>R</sup></i>                             | RW1588                         | published (39)                                                             |
| EAW1134                        | <i>dinB-YPet::FRT dnaX-</i>                                                                                | EAW643                         | Transduction of EAW643                                                     |

|                                |                                                                                                     |                            |                                                                       |
|--------------------------------|-----------------------------------------------------------------------------------------------------|----------------------------|-----------------------------------------------------------------------|
|                                | <i>mKate2::FRT sulA::Kan<sup>R</sup></i>                                                            |                            | with P1 grown on EAW13                                                |
| EAW1141                        | <i>dinB-YPet::FRT dnaX-mKate2::FRT sulA::FRT lexA51(Def)::Cm<sup>R</sup></i>                        | EAW1134                    | Transduction of EAW1134 with P1 grown on DE406 (71)                   |
| EAW1144                        | <i>dinB-YPet::FRT dnaX-mKate2::FRT sulA::FRT lexA51(Def)::Cm<sup>R</sup> ΔrecB::Kan<sup>R</sup></i> | EAW1141                    | Transduction of EAW1141 with P1 grown on EAW102                       |
| EAW287                         | <i>recA730 sulA::FRT</i>                                                                            | MG1655                     | published (47)                                                        |
| MEC030                         | <i>recA730 sulA</i> + pUA66- <i>P<sub>sulA</sub>-gfp</i>                                            | EAW287<br>Kan <sup>S</sup> | Transformation of EAW287 with pUA66- <i>P<sub>sulA</sub>-gfp</i> (49) |
| MG1655 + pEAW1162              | pBAD-MuGam-PAmCherry                                                                                | MG1655                     | Transformation of MG1655 with pBAD-MuGam-PAmCherry                    |
| MG1655 + pSTB- <i>sodA-gfp</i> | <i>P<sub>sodA</sub>-sf-gfp</i>                                                                      | MG1655                     | Transformation of MG1655 with pSTB- <i>sodA-gfp</i>                   |
| MG1655 + pCJH0008              | <i>P<sub>ahpC</sub>-sf-gfp</i>                                                                      | MG1655                     | Transformation of MG1655 with pQCJH0008                               |
| MG1655 + pCJH0009              | <i>P<sub>fepD</sub>-sf-gfp</i>                                                                      | MG1655                     | Transformation of MG1655 with pCJH0009                                |

#### 459 *ROS reporter fusions construction*

460 Three promoters of genes regulated by changes in ROS or iron levels were cloned  
 461 and fused to the *sf-gfp* gene (45) into a pQBI63 plasmid (Qbiogene). Briefly, upstream  
 462 regions of *sodA* gene (consisting of the 284 nt intergenic region of *rhaT* and *sodA*) regulated  
 463 by *soxS* and Fur (4,41), or *ahpC* gene (-372 to -1 nt of ATG) regulated by OxyR (4,42,43),  
 464 or *fepD* gene (-170 to -1 nt of ATG) regulated by Fur (44), were amplified and cloned into the  
 465 pQBI63 plasmid using *BglII/NheI* restriction enzyme to generate respectively pSTB-*sodA-*  
 466 *gfp*, pCJH0008 and pCJH0009. All constructions were confirmed by sequencing.

#### 467 *DNA damaging agent sensitivity assay*

468 Cells were grown in EZ glucose medium overnight at 37°C. The next day, a dilution  
 469 1/1000 of each culture was grown in EZ glucose (at 37°C, 150 rpm) until reaching mid log  
 470 phase (OD<sub>600</sub> = 0.3). Six aliquots of 300 μL of each culture were transferred in 24  
 471 microplates. The first aliquot was used as control of no treatment, 2% DMSO (282 mM, 0.2 x

472 MIC (5)), 30 ng/mL ciprofloxacin, 30 ng/mL ciprofloxacin + 2% DMSO, 1 µg/mL trimethoprim  
473 or 1 µg/mL trimethoprim + 2% DMSO were added in the others. Samples of 150 µL were  
474 taken at 0 and 60 min; samples at 0 h were taken just before treatment. Each sample was  
475 serial diluted in PBS by factor ten down to  $10^{-6}$  and dilutions  $10^{-1}$  to  $10^{-6}$  were spotted on  
476 fresh LB plates (Difco brand). Plates were incubated overnight at 37°C in the dark.

#### 477 *Survival assay following MuGam-PAmCherry expression*

478 To test the effect of MuGam-PAmCherry expression levels on lethality following  
479 ciprofloxacin and trimethoprim exposure, seven cells cultures were set up, expressing  
480 different levels of MuGam-PAmCherry from a pBAD plasmid. Cells cultures 1-7 (each 1 mL)  
481 were grown in EZ glycerol medium in the presence of ampicillin (100 µg/mL) and different L-  
482 arabinose concentrations (0, 0.001, 0.003, 0.01, 0.03, 0.1%) and cell culture 8 (1 mL) was  
483 grown EZ glucose medium in the presence of ampicillin (100 µg/mL) in overnight at 37°C,  
484 950 rpm. The next day, a 10/1000 dilution of each culture (final volume of 1.5 mL) was  
485 grown under the same conditions as over-night growth for 3 h. Each culture was split in three  
486 and no drug, 30 ng/mL ciprofloxacin or 1 µg/mL trimethoprim was added. These cultures  
487 were grown (at 37°C, 950 rpm) for 2 h. Then, cultures were spin down (5 min; 5,000 g) and  
488 cell pellets were resuspended in 0.5 mL corresponding EZ medium; centrifugation and  
489 resuspension was carried out three times. Each cell culture was serial diluted in PBS by  
490 factor ten down to  $10^{-5}$  and dilutions  $10^{-1}$  to  $10^{-5}$  were spotted on fresh LB plates containing  
491 100 µg/mL ampicillin (Difco brand). Plates were incubated overnight at 37°C in the dark. For  
492 each condition, biological triplicates were performed. From these experiments, an L-  
493 arabinose concentration of 0.003% was chosen for fluorescence microscopy experiments  
494 because this L-arabinose concentration showed no drastic decrease in survival compared to  
495 the sample grown in the presence of glucose.

496 *Plate reader assay*

497 Cells were grown in EZ glucose medium overnight at 37°C. The next day, a dilution  
498 10/1000 of each culture was grown in EZ glucose (at 37°C, 950 rpm) for 3 h. These cultures  
499 were diluted to 1/200. Then, 10 µL of these diluted cultures were added to a total volume of  
500 200 µL medium in each well of a 96-well plate. These 200 µL of media contained antibiotic,  
501 or hydrogen peroxide, and/or ROS mitigators (final concentration: 5, 10, 20 and 40 ng/mL ±  
502 2% DMSO or ± 0.35 mM BiP; 0.1, 0.3, 1 and 3 µg/mL ± 2% DMSO or ± 0.35 mM BiP; 30,  
503 100, 300 and 500 mM hydrogen peroxide [H<sub>2</sub>O<sub>2</sub>] ± 2% DMSO). For experiments with  
504 antibiotics and/or ROS mitigators, antibiotics and/or ROS mitigators were added just before  
505 cells were added. For experiments with hydrogen peroxide, hydrogen peroxide was added  
506 subsequently after cells were added. For each well, absorbance (OD<sub>600</sub>) is measured every  
507 30 min over 17 h or 18 h. The fluorescence signal was measured at each time point ( $\lambda_{\text{excitation}}$   
508 = 470 ± 15 nm,  $\lambda_{\text{emission}}$  = 515 ± 20 nm). For cells carrying *PsulA*-gfp, experiments were  
509 carried out in 96-well plates from Nalge Nunc International (no. 265301). For cells carrying  
510 *PsodA*-sf-gfp, *PahpC*-sf-gfp or *PfepD*-sf-gfp, experiments were carried out in 96-well plates  
511 from Thermo Scientific (no. 165305). The experiments were carried out using the  
512 CLARIOstar plate reader (BMG Labtech; settings: orbital reading 4 mm (for 96-well plates  
513 from Nalge Nunc International) or 2 mm (for 96-well plates from Thermo Scientific), orbital  
514 shaking at 200 rpm, at 37 °C).

515 Cell cultures were also serially diluted and plated on LB agar plates in order to  
516 calculate the number of cells added to each well. To each well, when adding wild-type cells,  
517 10<sup>5</sup> – 10<sup>6</sup> cells were added at the beginning of the experiment. For experiments when adding  
518  $\Delta\text{recB}$  cells, 10<sup>5</sup> cells were added at the beginning of the experiment.

519 *Fluorescence microscopy*

520 For all experiments except for experiments including imaging of MuGam-PAMCherry  
521 (**Fig. 3**), wide-field fluorescence imaging was conducted on an inverted microscope (IX-81,  
522 Olympus with a 1.49 NA 100x objective) in an epifluorescence configuration (47).

523 Continuous excitation is provided using semidiode lasers (Sapphire LP, Coherent) of the  
524 wavelength 514 nm (150 mW max. output) and 568 nm (200 mW max. output).  $\tau$ -mKate2 in  
525 EAW643 and UmuC-mKate2 in EAW282 were imaged using yellow excitation light ( $\lambda = 568$   
526 nm) at high intensity ( $2750 \text{ Wcm}^{-2}$ ), collecting emitted light between 610–680 nm (ET  
527 645/75m filter, Chroma) on a  $512 \times 512$  pixel EM-CCD camera (C9100-13, Hamamatsu).  
528 Images of UmuC-mKate2 in RW1286 were recorded at  $275 \text{ Wcm}^{-2}$ . For DinB-YPet imaging  
529 of EAW643, we used green excitation ( $\lambda = 514 \text{ nm}$ ) at  $160 \text{ Wcm}^{-2}$  collecting light emitted  
530 between 525–555 nm (ET540/30m filter, Chroma). For DinB-YPet imaging of RW1594, cells  
531 were imaged at  $51 \text{ Wcm}^{-2}$ .  $\tau$ -YPet imaging (EAW282, RW1286) was performed at  $51 \text{ Wcm}^{-2}$ .  
532 Cells carrying the SOS reporter plasmid pUA66-*suIA*-gfp (SSH091, SSH111) were imaged at  
533  $16 \text{ Wcm}^{-2}$ .

534 For experiments including imaging of MuGam-PAmCherry (**Fig. 3**), imaging was  
535 conducted on an inverted microscope (Nikon Eclipse-Ti), equipped with a 1.49 NA 100 $\times$   
536 objective and a  $512 \times 512$  pixel<sup>2</sup> Photometrics Evolve CCD camera (Photometrics, Arizona,  
537 US). NIS-Elements equipped with JOBS module was used to operate the microscope  
538 (Nikon, Japan). Continuous excitation is provided using semidiode lasers of the wavelength  
539 405 nm (OBIS, Coherent, 200 mW max. output) and 568 nm (Sapphire LP, Coherent, 200  
540 mW max. output). MuGam-PAmCherry was imaged by simultaneous illumination with the  
541 activation laser 405 nm ( $1\text{--}5 \text{ W cm}^{-2}$ ) and 568 nm readout laser ( $540 \text{ W cm}^{-2}$ ), a PALM  
542 (photoactivation localization microscopy) acquisition protocol, collecting emitted light from  
543 590 nm (ET590LP, Chroma).

544 Two-color time-lapse movies were recorded to visualize if DinB-YPet foci overlap with  
545  $\tau$ -mKate2 foci (EAW643). Sets of three images were recorded (bright-field [34 ms exposure],  
546 mKate2 fluorescence [100 ms exposure], YPet fluorescence [50 ms exposure]) at an interval  
547 of 10 min for 3 h. To measure colocalization between UmuC-mKate2 with the replisome  
548 marker  $\tau$ -YPet (EAW282), we recorded time-lapse movies at the same intervals but different

549 exposures for the replisome marker (bright-field [34 ms exposure], mKate2 fluorescence  
550 [100 ms exposure], YPet fluorescence [500 ms exposure]).

551 Burst acquisitions of DinB-YPet (movies of 300 × 50 ms frames taken every 100 ms  
552 light at 514 nm) were collected, subsequently to each burst acquisition, an image of  $\tau$ -  
553 mKate2 (568 nm) was taken (imaging sequence for RW1594). With this imaging sequence,  
554 we analysed activity of DinB-YPet at replisomes. RW1286 was imaged similarly; we  
555 recorded burst acquisitions of UmuC-mKate2 (568 nm) followed by a snapshot of  $\tau$ -YPet  
556 (514 nm). All images were analysed with ImageJ (77).

557 The MuGam-PAmCherry imaging acquisition was recorded as a set of two  
558 acquisitions, 1. bright-field image (100 ms exposure), 2. PAmCherry fluorescence  
559 [simultaneous illumination with the activation laser 405 and 568 nm readout laser for 200  
560 frames each with 100 ms exposure]). This protocol was only executed once for a field-of-  
561 view to minimize laser damage. Consequently, before and after antibiotic treatment shows a  
562 new set of cells. Images taken after antibiotic addition were recorded following 2 h of  
563 antibiotic treatment.

#### 564 *Flow cell designs*

565 All imaging experiments were carried out in home-built quartz-based flow cells.  
566 These flow cells were assembled from a no. 1.5 coverslip (Marienfeld, REF 0102222, for  
567 imaging on IX-81, Olympus) or (Marienfeld, REF 0107222, for imaging on Nikon Eclipse-Ti),  
568 a quartz top piece (45x20x1 mm) and PE-60 tubing (Instech Laboratories, Inc.). Prior to flow-  
569 cell assembly, coverslips were silanized with (3-aminopropyl)triethoxysilane (APTES, from  
570 Alfa Aesar). First, coverslips were sonicated for 30 min in a 5M KOH solution to clean and  
571 activate the surface. The cleaned coverslips were rinsed thoroughly with MilliQ water and  
572 then treated with a 5% (v/v) solution of APTES in MilliQ water. The coverslips were  
573 subsequently rinsed with ethanol and sonicated in ethanol for 20 seconds. Afterwards, the  
574 coverslips were rinsed with MilliQ water and dried in a jet of N<sub>2</sub>. Silanized slides were stored  
575 under vacuum prior to use.

576 To assemble each flow cell, polyethylene tubing (BTPE-60, Instech Laboratories,  
577 Inc.) was glued (BONDiT B-482, Reltek LLC) into two holes that were drilled into a quartz  
578 piece. After the glue solidified overnight, double-sided adhesive tape was stuck on two  
579 opposite sides of the quartz piece to create a channel. Then, the quartz piece was stuck to  
580 an APTES-treated coverslip. The edges were sealed with epoxy glue (5 Minute Epoxy,  
581 PARFIX). Each flow cell was stored in a desiccator under mild vacuum while the glue dried.  
582 Typical channel dimensions were 45 mm × 5 mm × 0.1 mm (length × width × height).

### 583 *Preparation of cell cultures for microscopy*

584 The day before each experiment, for all experiments, an over-night culture was  
585 grown from a freezer stock for each cell culture. Cells that did not carry the MuGam-  
586 PAmCherry plasmid were grown at 37°C in EZ rich defined medium (Teknova) that contained  
587 0.2% (w/v) glucose. All strains that have a *Kan<sup>R</sup>* cassette were grown in the presence of  
588 kanamycin (20 µg/mL). Cells that carried the MuGam-PAmCherry plasmid were grown at  
589 37°C in EZ rich defined medium (Teknova) that contained 0.2% (w/v) glycerol and 0.001% L-  
590 arabinose, in the presence of ampicillin (100 µg/mL).

591 At the day of the experiment, for all imaging experiments excluding imaging of  
592 MuGam fusion, cells were grown at 37°C in EZ rich defined medium (Teknova) that  
593 contained 0.2% (w/v) glucose. All strains that have a *Kan<sup>R</sup>* cassette were grown in the  
594 presence of kanamycin (20 µg/mL). Cultures used for imaging under ROS-mitigating  
595 conditions were grown in the presence of the particular mitigator used for the experiment  
596 (DMSO [2% v/v, 282 mM, 0.2 x MIC (5)] or BiP [0.35 mM, 0.5 x MIC (5)], culture time ~3 h  
597 for *recB<sup>+</sup> lexA<sup>+</sup>*, ~4 h for  $\Delta recB lexA<sup>+</sup>$  and ~6 h for  $\Delta recB lexA[Def]$ ). For imaging experiments  
598 of the MuGam fusion, cells were grown at 37°C in EZ rich defined medium (Teknova) that  
599 contained 0.2% (w/v) glycerol and 0.001% L-arabinose. All strains were grown in the  
600 presence of ampicillin (100 µg/mL). Cultures used for imaging under ROS-mitigating  
601 conditions were grown in the presence of DMSO [2% v/v, 282 mM, 0.2 x MIC (5)] for ~3 h  
602 culture time.



603 *Imaging in flow cells*

604 Cells were loaded into flow cells (*SI Appendix*, Fig. 1A), allowed a few minutes to  
605 associate with the APTES surface, then loosely associated cells were removed by pulling  
606 through fresh medium. The experiment was then initiated by adding either an antibiotic alone  
607 or in combination with DMSO to the medium (30 ng/ mL ciprofloxacin, 30 ng/ mL  
608 ciprofloxacin with 2% (v/v) DMSO, 1 µg/mL trimethoprim, 1 µg/mL trimethoprim with 2% (v/v)  
609 DMSO or 1 µg/mL trimethoprim with 0.35 mM BiP). Throughout the experiment, medium was  
610 pulled through the flow cell using a syringe pump, at a rate of 50 µL/min. For each condition,  
611 triplicate measurements were recorded.

612 *Analysis of cell filamentation, concentrations, SOS induction level and number of foci*

613 We selected single cells to obtain information about SOS induction, DinB and UmuC  
614 levels upon UV irradiation (>100 cells for every time point). MicrobeTracker 0.937 (78), a  
615 MATLAB script, was used to create cell outlines as regions of interest (ROI). We manually  
616 curated cell outlines designated by MicrobeTracker at t = 0 min (time point of antibiotic  
617 addition) and at 30 min time intervals until 180 min. By obtaining cell outlines manually, we  
618 ensure accuracy and purely select non-overlapping, in-focus cells for analysis. These ROI  
619 were imported in ImageJ 1.50i. The cell outlines were then used to measure mean cell  
620 intensities, cell lengths and the number of foci per cell. Parameters describing foci (number,  
621 positions and intensities) were obtained using a Peak Fitter plug-in, described previously  
622 (39,47). Prior to determining DinB-YPet foci UmuC-mKate2 per cell from burst acquisition  
623 movies in *lexA(Def)*, average projections in time were curated from frame 1 to 101 (10 x 100  
624 ms = 1 s). Prior to determining MuGam-PAmCherry foci per cell from burst acquisition  
625 movies, maximum projections in time were curated over the entire movie, capturing all  
626 binding events of MuGam-PAmCherry.

627 Using information of mean cell brightness derived from DinB-YPet expressing cells,  
628 we also calculated DinB-YPet concentrations of cells grown in the absence or presence of  
629 antibiotic. In a previous study (39), we calculated the DinB-YPet concentration which

630 correlates with a certain mean cell brightness (in the absence of ciprofloxacin:  $6 \pm 1$  nm [SE];  
631 180 min after ciprofloxacin treatment:  $34 \pm 3$  nM [SE]). We utilized these values to calculate  
632 the DinB-YPet concentration for ciprofloxacin  $\pm$  DMSO or trimethoprim  $\pm$  DMSO treated  
633 cells.

#### 634 *Analysis of colocalization events*

635 Foci were classed as colocalized if their centroid positions (determined using our  
636 peak fitter tool) fell within 2.18 px (218 nm) of each other. When treating with ciprofloxacin,  
637 we determined that for DinB-YPet- $\tau$ -mKate2 localization the background of DinB foci  
638 expected to colocalize with replisomes purely by chance is ~4% at 180 min. This was  
639 calculated by taking the area of each cell occupied by replisome foci (including the  
640 colocalization search radius) and dividing by the total area of the cell. The value of 4%  
641 corresponds to the mean of measurements made over 121 cells. Since the foci density of  
642 replisomes stays fairly constant following ciprofloxacin treatment, the chance colocalization  
643 of DinB-YPet foci with  $\tau$ -mKate2 is ~4% during the experiment (39). Chance colocalization of  
644  $\tau$ -mKate2 with DinB-YPet is however not constant over time because most cells contain no  
645 pol IV foci in the absence of any DNA damage. Chance colocalization is close to zero at 0  
646 min; at 60 min, chance colocalization is ~5%; at 120 min, chance colocalization is ~3%.  
647 Moreover, chance colocalization of  $\tau$ -mKate2 with DinB-YPet is overall reduced under ROS-  
648 mitigating conditions due to a reduced number of foci per cell (chance colocalization close to  
649 zero at 0 min; at 120 min, ~2%). Chance colocalization of  $\tau$ -mKate2 with DinB-YPet in  
650 trimethoprim-treated cells amounts to ~1% from 60-90 min (close to zero before 60 min).  
651 Under ROS-mitigating conditions, chance colocalization is always close to zero because the  
652 number of pol IV foci per cell does not increase post treatment as well as cell size (**Fig. 1**).

653 The chance colocalization of UmuC-mKate2 with  $\tau$ -YPet is similar to the chance  
654 colocalization of DinB-YPet with  $\tau$ -mKate2 (chance colocalization: ~4%). The expected  
655 colocalization of  $\tau$ -YPet with UmuC-mKate2 by background is close to zero until 90 min.  
656 UmuC-mKate2 is neither upregulated nor released from the membrane (*SI Appendix*, Fig.

657 13A). Chance colocalization is ~3% at 180 min after ciprofloxacin treatment and ~2% after  
658 the combinational treatment of ciprofloxacin/DMSO.

### 659 *Western blotting*

660 Overnight *E. coli* LB cultures of RW120/pRW154 and RW546/pRW154 (75) were  
661 diluted 1 to 100 in fresh LB with appropriate antibiotics and grown to mid-log (~OD 0.5, ~3  
662 hrs). Aliquots were then taken for the untreated samples. Either ciprofloxacin (30 ng/mL) or  
663 trimethoprim (1 µg/mL) was added to the remaining culture and incubated with or without the  
664 addition of 2% DMSO. Samples were taken at 1, 2 and 3 hours. Whole cell extracts were  
665 made by centrifuging 1.5 mL of culture and adding 90 µl of sterile deionized water and 30µL  
666 of NuPAGE LDS sample buffer (4X) (Novex, Life Technologies) to the cell pellet. Five cycles  
667 of freeze/thaw on dry ice and in a 37<sup>o</sup>C water bath were performed to lyse the cells. Extracts  
668 were boiled for 5 minutes prior to loading. Samples were run on NuPAGE 4-12% Bis-Tris  
669 gels (Novex Life Technologies) and transferred to Invitrolon PVDF (0.45 µm pore size)  
670 membranes (Novex Life Technologies). Membranes were incubated with anti-UmuD  
671 antibodies (1:5,000 dilution) at room temperature overnight. Then the membranes were  
672 incubated with goat anti-rabbit IgG (H+L) alkaline phosphatase conjugate (1:10,000 dilution)  
673 (BIO-RAD). Subsequently, the membranes were treated with the CDP-Star substrate  
674 (Tropix). Membranes were then exposed to BioMax XAR film (Carestream) to visualize  
675 UmuD protein bands.

### 676 **Acknowledgements**

677 We thank Amy E. McGrath, Jonathan Williams, Martina L. Sanderson-Smith for  
678 assistance with plate reader assays. MMC was supported by grant GM32335 from the  
679 National Institute of General Medical Sciences USA. RW was supported by funds from the  
680 National Institutes of Health, National Institute of Child Health and Human Development  
681 Intramural Research Program. AvO was supported by a Laureate Fellowship FL140100027  
682 from the Australian Research Council. AR was supported by was supported by Project Grant

683 APP1165135 from the National Health and Medical Research Council and funds from the  
684 Faculty of Science, Medicine and Health and the Illawarra Health and Medical Research  
685 Institute.

#### 686 **Conflict of interest**

687 The authors declare no conflict of interest.

#### 688 **References**

- 689 1. X. Zhao, K. Drlica, Reactive oxygen species and the bacterial response to lethal  
690 stress. *Curr. Opin. Microbiol.* **21**, 1–6 (2014).
- 691 2. H. van Acker, T. Coenye, The role of reactive oxygen species in antibiotic-mediated  
692 killing of bacteria. *Trends Microbiol.* **25**, 456–466 (2017).
- 693 3. J. A. Imlay, The molecular mechanisms and physiological consequences of oxidative  
694 stress: lessons from a model bacterium. *Nat. Rev. Microbiol.* **11**, 443–454 (2013).
- 695 4. J. A. Imlay, Where in the world do bacteria experience oxidative stress? *Environ.*  
696 *Microbiol.* **21**, 521–530 (2019).
- 697 5. Y. Hong, L. Li, G. Luan, K. Drlica, X. Zhao, Contribution of reactive oxygen species to  
698 thymineless death in *Escherichia coli*. *Nat. Microbiol.* **2**, 1667–1675 (2017).
- 699 6. A. Liu, L. Tran, E. Becket, K. Lee, L. Chinn *et al.*, Antibiotic sensitivity profiles  
700 determined with an *Escherichia coli* gene knockout collection: Generating an antibiotic  
701 bar code. *Antimicrob. Agents Chemother.* **54**, 1393–1403 (2010).
- 702 7. J. J. Foti, B. Devadoss, J. A. Winkler, J. J. Collins, G. C. Walker, Oxidation of the  
703 guanine nucleotide pool underlies cell death by bactericidal antibiotics. *Science.* **336**,  
704 315–319 (2012).
- 705 8. D. J. Dwyer, M. A. Kohanski, J. J. Collins, Role of reactive oxygen species in

- 706 mechanisms of antimicrobial resistance in bacteria. *Curr. Opin. Microbiol.* **12**, 482–  
707 489 (2009).
- 708 9. K. Drlica, X. Zhao, DNA gyrase, topoisomerase IV, and the 4-quinolones. *Microbiol.*  
709 *Mol. Biol. Rev.* **61**, 377–392 (1997).
- 710 10. J. J. Champoux, DNA topoisomerases: structure, function, and mechanism. *Annu.*  
711 *Rev. Biochem.* **70**, 369–413 (2001).
- 712 11. X. Zhao, C. Xu, J. Domagala, K. Drlica, DNA topoisomerase targets of the  
713 fluoroquinolones: a strategy for avoiding bacterial resistance. *Proc. Natl. Acad. Sci.*  
714 *U.S.A.* **94**, 13991–13996 (1997).
- 715 12. M. Goswami, S. H. Mangoli, N. Jawali, Involvement of reactive oxygen species in the  
716 action of ciprofloxacin against *Escherichia coli*. *Future Microbiol.* **6**, 949–954 (2014).
- 717 13. X. Giroux, W.-L. Su, M.-F. Bredeche, I. Matic, Maladaptive DNA repair is the ultimate  
718 contributor to the death of trimethoprim-treated cells under aerobic and anaerobic  
719 conditions. *Proc. Natl. Acad. Sci. U.S.A.* **114**, 11512–11517 (2017).
- 720 14. M. A. Kohanski, D. J. Dwyer, B. Hayete, C. A. Lawrence, J. J. Collins, A common  
721 mechanism of cellular death induced by bactericidal antibiotics. *Cell* **130**, 797–810  
722 (2007).
- 723 15. D. J. Dwyer, J. J. Collins, G. C. Walker, Unraveling the physiological complexities of  
724 antibiotic lethality. *Annu. Rev. Pharmacol. Toxicol.* **55**, 313–332 (2015).
- 725 16. C. C. Gruber, G. C. Walker, Incomplete base excision repair contributes to cell death  
726 from antibiotics and other stresses. *DNA Repair.* **71**, 108–117 (2018).
- 727 17. H. Mi, D. Wang, Y. Xue, Z. Zhang, J. Niu *et al.* Dimethyl sulfoxide protects  
728 *Escherichia coli* from rapid antimicrobial-mediated killing. *Antimicrob. Agents*  
729 *Chemother.* **60**, 5054–5058 (2016).

- 730 18. K. Drlica, M. Malik, R. J. Kerns, X. Zhao, Quinolone-mediated bacterial death.  
731 *Antimicrob. Agents Chemother.* **52**, 385–392 (2008).
- 732 19. M. Yamada, T. Nunoshabi, M. Shimizu, P. Grúz, H. Kamiya *et al.*, Involvement of Y-  
733 family DNA polymerases in mutagenesis caused by oxidized nucleotides in  
734 *Escherichia coli*. *J. Bacteriol.* **188**, 4992–4995 (2006).
- 735 20. J. M. Moore, R. Correa, S. M. Rosenberg, P. J. Hastings, Persistent damaged bases  
736 in DNA allow mutagenic break repair in *Escherichia coli*. *PLoS Genet.* **13**, e1006733  
737 (2017).
- 738 21. C. Shee, J. L. Gibson, M. C. Darrow, C. Gonzalez, S. M. Rosenberg, Impact of a  
739 stress-inducible switch to mutagenic repair of DNA breaks on mutation in *Escherichia*  
740 *coli*. *Proc. Natl. Acad. Sci. U.S.A.* **108**, 13659–13664 (2011).
- 741 22. C. Shee, R. Ponder, J. L. Gibson, & S. M. Rosenberg, What limits the efficiency of  
742 double-strand break-dependent stress-induced mutation in *Escherichia coli*? *J. Mol.*  
743 *Microbiol. Biotechnol.* **21**, 8–19 (2012).
- 744 23. R. G. Ponder, N. C. Fonville, S. M. Rosenberg, A switch from high-fidelity to error-  
745 prone DNA double-strand break repair underlies stress-induced mutation. *Mol. Cell*  
746 **19**, 791–804 (2005).
- 747 24. P. L. Foster, Stress-induced mutagenesis in bacteria. *Crit. Rev. Biochem. Mol. Biol.*  
748 **42**, 373–397 (2007).
- 749 25. S. M. Rosenberg, C. Shee, R. L. Frisch, P. J. Hastings, Stress-induced mutation *via*  
750 DNA breaks in *Escherichia coli*: A molecular mechanism with implications for  
751 evolution and medicine. *Bioessays* **34**, 885–892 (2012).
- 752 26. V. G. Godoy, D. F. Jarosz, S. M. Simon, A. Abyzov, G. C. Walker, UmuD and RecA  
753 directly modulate the mutagenic potential of the Y-family DNA polymerase DinB. *Mol.*

- 754            *Cell* **28**, 1058–1070 (2007).
- 755    27.    S. Mallik, E. M. Popodi, A. J. Hanson, P. L. Foster, Interactions and localization of  
756            *Escherichia coli* error-prone DNA Polymerase IV after DNA damage. *J. Bacteriol.*  
757            **197**, 2792–2809 (2015).
- 758    28.    R. T. Pomerantz, I. Kurth, M. F. Goodman, M. O'Donnell, Preferential D-loop  
759            extension by a translesion DNA polymerase underlies error-prone recombination. *Nat.*  
760            *Struct. Mol. Biol.* **20**, 748–755 (2013).
- 761    29.    R. T. Pomerantz, M. F. Goodman, M. E. O'Donnell, DNA polymerases are error-prone  
762            at RecA-mediated recombination intermediates. *Cell Cycle* **12**, 2558–2563 (2013).
- 763    30.    C. Indiani, M. Patel, M. F. Goodman, M. E. O'Donnell, RecA acts as a switch to  
764            regulate polymerase occupancy in a moving replication fork. *Proc. Natl. Acad. Sci.*  
765            *U.S.A.* **110**, 5410–5415 (2013).
- 766    31.    T. M. Cafarelli, T. J. Rands, V. G. Godoy, The DinB-RecA complex of *Escherichia coli*  
767            mediates an efficient and high-fidelity response to ubiquitous alkylation lesions.  
768            *Environ. Mol. Mutagen. Mutagen.* **55**, 92–102 (2014).
- 769    32.    S. S. Henrikus *et al.*, UmuD and RecA\* modulate the DNA-binding activity of DNA  
770            polymerase IV in *Escherichia coli*. *bioRxiv*:620195 (29 April 2019).
- 771    33.    T. F. Tashjian, C. Danilowicz, A.-E. Molza, B. H. Nguyen, C. Prévost *et al.* Residues  
772            in the fingers domain of the translesion DNA polymerase DinB enable its unique  
773            participation in error-prone double strand break repair. *J. Biol. Chem.*  
774            jbc.RA118.006233 (2019).
- 775    34.    G. R. Smith, Homologous recombination in prokaryotes: enzymes and controlling  
776            sites. *Genome* **31**, 520–527 (1989).
- 777    35.    L. A. Simmons, J. J. Foti, S. E. Cohen, G. C. Walker, The SOS regulatory network.

- 778 *EcoSal Plus* **3**, doi:10.1128/ecosalplus.5.4.3 (2008).
- 779 36. A. McPartland, L. Green, H. Echols, Control of *recA* gene RNA in *E. coli*: Regulatory  
780 and signal genes. *Cell* **20**, 731–737 (1980).
- 781 37. K. G. Newmark, E. K. O'Reilley, J. R. Pohlhaus, K. N. Kreuzer, Genetic analysis of the  
782 requirements for SOS induction by nalidixic acid in *Escherichia coli*. *Gene* **356**, 69–76  
783 (2005).
- 784 38. J. Courcelle, A. Khodursky, B. Peter, P. O. Brown, P. C. Hanawalt, Comparative gene  
785 expression profiles following UV exposure in wild-type and SOS-deficient. *Genetics*  
786 **158**, 41–64 (2001).
- 787 39. S. S. Henrikus, E. A. Wood, J. P. McDonald, M. M. Cox, R. Woodgate *et al.*, DNA  
788 polymerase IV primarily operates outside of DNA replication forks in *Escherichia coli*.  
789 *PLoS Genet.* **14**, e1007161 (2018).
- 790 40. Imlay, J. A. Transcription factors that defend bacteria against reactive oxygen  
791 species. *Annu. Rev. Microbiol.* **69**, 93–108 (2015).
- 792 41. S. W. Seo, D. Kim, R. Szubin, B. O. Palsson, Genome-wide reconstruction of OxyR  
793 and SoxRS transcriptional regulatory networks under oxidative stress in *Escherichia*  
794 *coli* K-12 MG1655. *Cell Rep.* **12**, 1289–1299 (2015).
- 795 42. G. Storz, L. A. Tartaglia, B. N. Ames, The OxyR regulon. *Antonie van Leeuwenhoek*,  
796 *Int. J. Gen. Mol. Microbiol.* **58**, 157–161 (1990).
- 797 43. I. L. Jung, I. G. Kim, Transcription of *ahpC*, *katG*, and *katE* genes in *Escherichia coli*  
798 is regulated by polyamines: Polyamine-deficient mutant sensitive to H<sub>2</sub>O<sub>2</sub>-induced  
799 oxidative damage. *Biochem. Biophys. Res. Commun.* **301**, 915–922 (2003).
- 800 44. J. L. Lavrrar, C. A. Christoffersen, M. A. McIntosh, Fur-DNA interactions at the  
801 bidirectional *fepDGC-entS* promoter region in *Escherichia coli*. *J. Mol. Biol.* **322**, 983–



- 802            995 (2002).
- 803    45.    E. A. Ronayne, Y. C. S. Wan, B. A. Boudreau, R. Landick, M. M. Cox, P1 Ref  
804            endonuclease: a molecular mechanism for phage-enhanced antibiotic lethality. *PLoS*  
805            *Genet.* **12**, e1005797 (2016).
- 806    46.    M. Goswami, S. H. Mangoli, N. Jawali, Involvement of reactive oxygen species in the  
807            action of ciprofloxacin against *Escherichia coli*. *Antimicrob. Agents Chemother.* **50**,  
808            949–954 (2006).
- 809    47.    A. Robinson, J. P. McDonald, V. E. A. Caldas, M. Patel, E. A. Wood *et al.*, Regulation  
810            of mutagenic DNA polymerase V activation in space and time. *PLoS Genet.* **11**,  
811            e1005482 (2015).
- 812    48.    G.-W. Li, X. Sunney Xie. Central dogma at the single-molecule level of living cells.  
813            *Nature* **475**, 308–315 (2011).
- 814    49.    A. Zaslaver, A. Bren, M. Ronen, S. Itzkovitz, I. Kikoin *et al.*, A comprehensive library  
815            of fluorescent transcriptional reporters for *Escherichia coli*. *Nat. Methods* **3**, 623–628  
816            (2006).
- 817    50.    A. Rodriguez- Rosado *et al.*, Reactive oxygen species are major contributors to SOS-  
818            mediated mutagenesis induced by fluoroquinolones. *bioRxiv*:428961 (27 September  
819            2018).
- 820    51.    L. L. Shen, A. G. Pernet, Mechanism of inhibition of DNA gyrase by analogues of  
821            nalidixic acid: The target of the drugs is DNA. *Proc. Natl. Acad. Sci. U.S.A.* **82**, 307–  
822            311 (1985).
- 823    52.    T. Dorr, K. Lewis, M. Vulic, SOS response induces persistence to fluoroquinolones in  
824            *Escherichia coli*. *PLoS Genet.* **5**, e1000760 (2009).
- 825    53.    C. Shee, B. D. Cox, F. Gu, E. M. Luengas, M. C. Joshi *et al.*, Engineered proteins

- 826 detect spontaneous DNA breakage in human and bacterial cells. *Elife* **2**, 1–25 (2013).
- 827 54. H. Ghodke, B. Paudel, J. Lewis, S. Jergic, K. Gopal *et al.*, Spatial and temporal  
828 organization of RecA in the *Escherichia coli* DNA-damage response. *Elife* **8**, e42761  
829 (2019).
- 830 55. J. P. Pribis, L. García-Villada, Y. Zhai, O. Lewin-Epstein, A. Wang *et al.* Gamblers: an  
831 antibiotic-induced evolvable cell subpopulation differentiated by reactive-oxygen-  
832 induced general stress response. *Mol. Cell* **74**, 785-800 (2019).
- 833 56. D. G. Ennis, B. Fisher, S. Edmiston, D. W. Mount, Dual role for *Escherichia coli* RecA  
834 protein in SOS mutagenesis. *Proc. Natl. Acad. Sci. U.S.A.* **82**, 3325–3329 (1985).
- 835 57. M. Snyder, K. Drlica, DNA gyrase on the bacterial chromosome: DNA cleavage  
836 induced by oxolinic acid. *J. Mol. Biol.* **131**, 287–302 (1979).
- 837 58. W. H. Deitz, T. M. Cook, W. A. Goss, Mechanism of action of nalidixic acid on  
838 *Escherichia coli* III. Conditions required for lethality. *J. Bacteriol.* **91**, 768–773 (1966).
- 839 59. M. Tang, X. Shen, E. G. Frank, M. O'Donnell, R. Woodgate *et al.*, UmuD<sub>2</sub>C is an  
840 error-prone DNA polymerase, *Escherichia coli* pol V. *Proc. Natl. Acad. Sci. U.S.A.* **96**,  
841 8919–8924 (1999).
- 842 60. R. T. Cirz, J. K. Chin, D. R. Andes, V. de Crécy-Lagard, W. A. Craig *et al.*, Inhibition of  
843 mutation and combating the evolution of antibiotic resistance. *PLoS Biol.* **3**, e176  
844 (2005).
- 845 61. A. Sakai, M. Nakanishi, K. Yoshiyama, H. Maki, Impact of reactive oxygen species on  
846 spontaneous mutagenesis in *Escherichia coli*. *Genes to Cells* **11**, 767–778 (2006).
- 847 62. R. Gleckman, N. Blagg, D. W. Joubert, Trimethoprim: Mechanisms of action,  
848 antimicrobial activity, bacterial resistance, pharmacokinetics, adverse reactions, and  
849 therapeutic indications. *Pharmacotherapy* **1**, 14–19 (1981).

- 850 63. B. Birdsall, G. C. Roberts, J. Feeney, J. Dann, A. Burgen, Trimethoprim binding to  
851 bacterial and mammalian dihydrofolate reductase: a comparison by proton and  
852 carbon-13 nuclear magnetic resonance. *Biochemistry* **22**, 5597–5604 (1983).
- 853 64. I. Vlašić, I. Ivančić-Baće, M. Imešek, B. Mihaljević, K. Brčić-Kostić, RecJ nuclease is  
854 required for SOS induction after introduction of a double-strand break in a RecA  
855 loading deficient *recB* mutant of *Escherichia coli*. *Biochimie* **90**, 1347–1355 (2008).
- 856 65. I. Vlašić, A. Šimatović, K. Brčić-Kostić, Genetic requirements for high constitutive SOS  
857 expression in *recA730* mutants of *Escherichia coli*. *J. Bacteriol.* **193**, 4643–4651  
858 (2011).
- 859 66. K. Morimatsu, S. C. Kowalczykowski, RecFOR proteins load RecA protein onto  
860 gapped DNA to accelerate DNA strand exchange: A universal step of recombinational  
861 repair. *Mol. Cell* **11**, 1337–1347 (2003).
- 862 67. A. Sakai, M. M. Cox, RecFOR and RecOR as distinct RecA loading pathways. *J. Bio*  
863 **284**, 3264–3272 (2009).
- 864 68. C. Lesterlin, G. Ball, L. Schermelleh, D. J. Sherratt, RecA bundles mediate homology  
865 pairing between distant sisters during DNA break repair. *Nature* **506**, 249–253 (2014).
- 866 69. E. G. Frank, D. G. Ennis, M. Gonzalez, A. S. Levine, R. Woodgate, Regulation of  
867 SOS mutagenesis by proteolysis. *Proc. Natl. Acad. Sci. U.S.A.* **93**, 10291–6 (1996).
- 868 70. L. C. Huang, E. A. Wood, M. M. Cox, Convenient and reversible site-specific targeting  
869 of exogenous DNA into a bacterial chromosome by use of the FLP recombinase: The  
870 FLIRT system. *J. Bacteriol.* **179**, 6076–6083 (1997).
- 871 71. D. G. Ennis, S. K. Amunsden, G. R. Smith, Genetic functions promoting homologous  
872 recombination in *Escherichia coli*: A study of inversions in phage  $\lambda$ . *Genetics* **115**, 11–  
873 24 (1987).

- 874 72. E. G. Frank, J. Hauser, A. S. Levine, R. Woodgate, Targeting the UmuD, UmuD $\square$ ,  
875 and MucA $\square$  mutagenesis proteins to DNA by RecA protein. *Proc. Natl. Acad. Sci.*  
876 *U.S.A.* **90**, 8169–8173 (1993).
- 877 73. D. R. Harris, S. V. Pollock, E. A. Wood, R. J. Goiffon, A. J. Klingele *et al.*, Directed  
878 evolution of ionizing radiation resistance in *Escherichia coli*. *J. Bacteriol.* **191**, 5240–  
879 5252 (2009).
- 880 74. F. R. Blattner, G. Plunkett III, C. A. Bloch, N. T. Perna, V. Burland *et al.*, The complete  
881 genome sequence of *Escherichia coli* K-12. *Science.* **277**, 1453–1474 (1997).
- 882 75. C. Ho, O. I. Kulaeva, A. S. Levine, R. Woodgate, A rapid method for cloning  
883 mutagenic DNA repair genes: Isolation of *umu*-complementing genes from multidrug  
884 resistance plasmids R391, R446b, and R471a. *J. Bacteriol.* **175**, 5411–5419 (1993).
- 885 76. S. Rangarajan, R. Woodgate, M. F. Goodman, Replication restart in UV-irradiated  
886 *Escherichia coli* involving pols II, III, V, PriA, RecA and RecFOR proteins. *Mol.*  
887 *Microbiol.* **43**, 617–628 (2002).
- 888 77. C. A. Schneider, W. S. Rasband, K. W. Eliceiri, NIH Image to ImageJ: 25 years of  
889 image analysis. *Nat. Methods* **9**, 671–675 (2012).
- 890 78. O. Sliusarenko, J. Heinritz, T. Emonet, C. Jacobs-Wagner, High-throughput, subpixel-  
891 precision analysis of bacterial morphogenesis and intracellular spatio-temporal  
892 dynamics. *Mol. Microbiol.* **80**, 612–627 (2012).

893

894

895 **Figures and figure legends**

# Figure 1

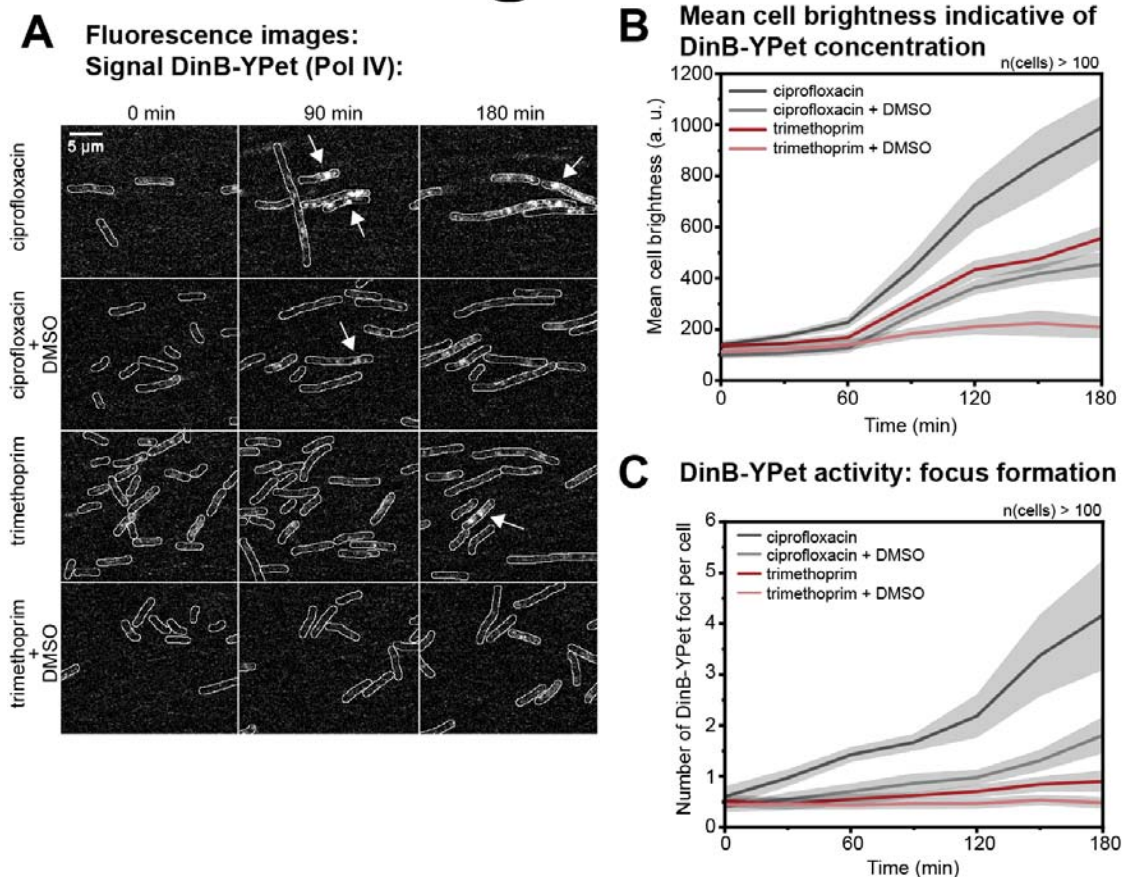

896

897 **Figure 1.** Pol IV concentration and activity following ciprofloxacin or trimethoprim  
898 treatment under normal conditions or ROS-mitigating conditions. (A) Fluorescence images  
899 showing cells expressing DinB-YPet (Pol IV) at 0, 90 and 180 min (left to right) after  
900 ciprofloxacin-alone, ciprofloxacin-DMSO, trimethoprim-alone or trimethoprim-DMSO  
901 treatment (top to bottom). Scale bar represents 5  $\mu$ m. (B) Concentration of DinB-YPet during  
902 stress. Mean cell brightness is plotted against time (ciprofloxacin-alone: dark grey line,  
903 ciprofloxacin-DMSO: light grey line, trimethoprim-alone: magenta line, trimethoprim-DMSO:  
904 light magenta line). At each time-point, data are derived from >100 cells. Grey shaded error  
905 bands represent standard error of the mean. (C) Number of DinB-YPet foci per cell are  
906 plotted against time (ciprofloxacin-alone: dark grey line, ciprofloxacin-DMSO: light grey line,

907 trimethoprim-alone: red line, trimethoprim-DMSO: light red line). At each time-point, data are  
908 derived from >100 cells. Grey shaded error bands represent standard error of the mean.

909

## Figure 2

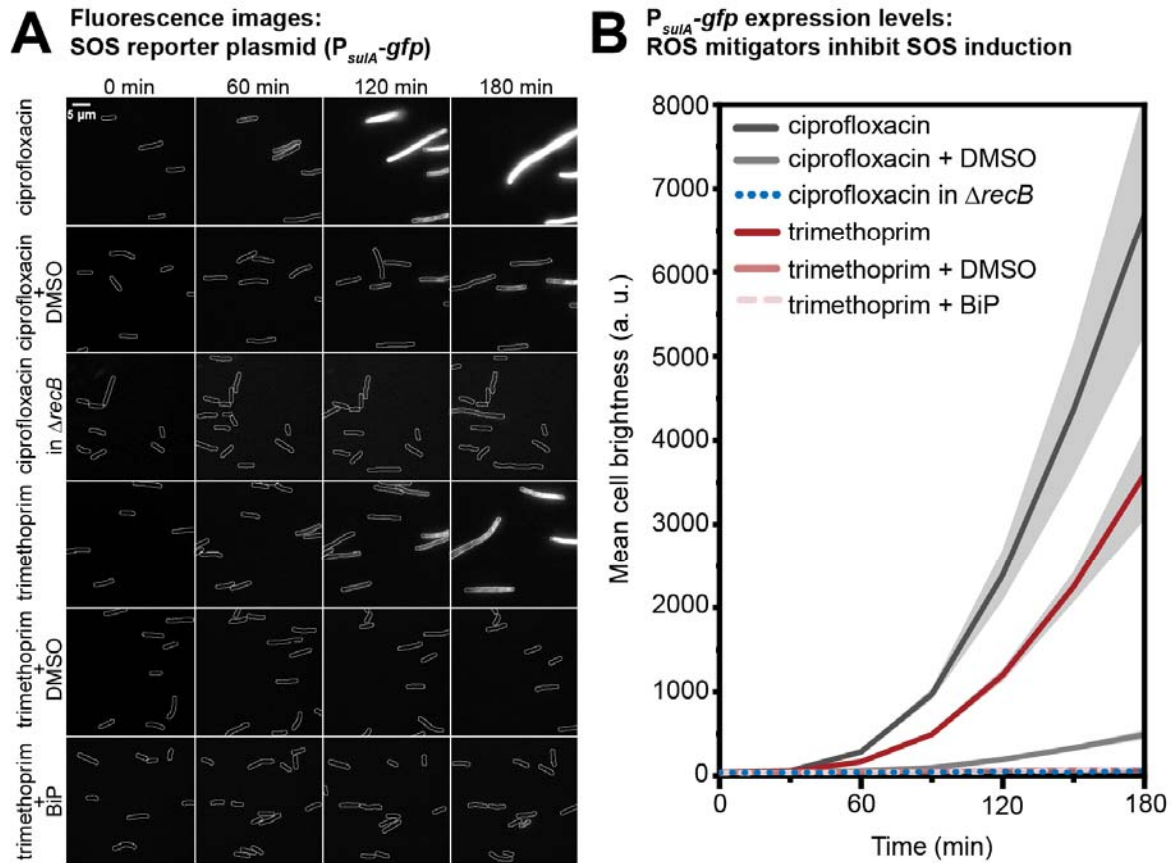

# Figure 3

## A Fluorescence signal: MuGam-PAmCherry at 0.003% L-ara

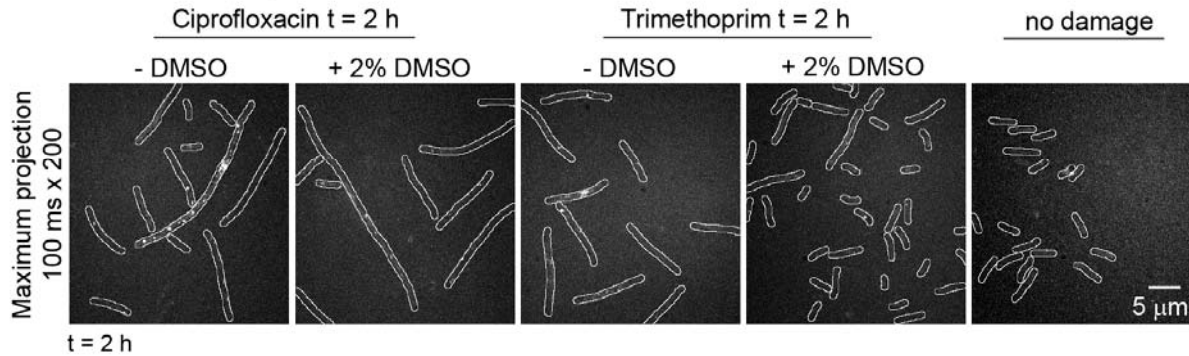

## B Percentage of cells containing MuGam foci

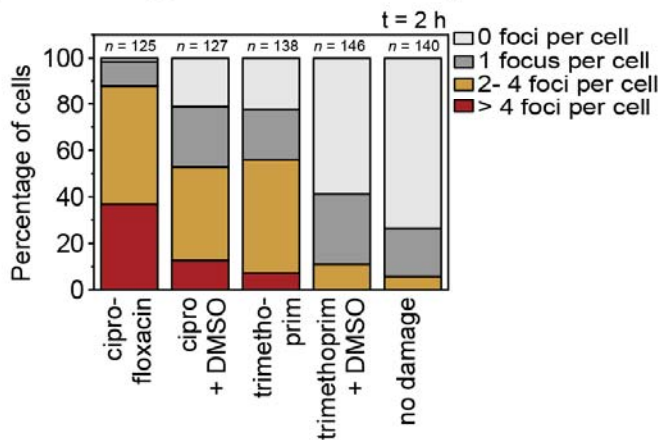

## C Mean MuGam foci per cell

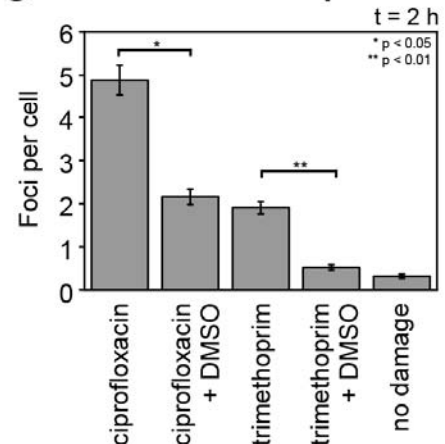

922

923 **Figure 3.** Number of MuGam-PAmCherry foci per cell following ciprofloxacin or trimethoprim  
 924 treatment under normal conditions or ROS-mitigating conditions in different genetic  
 925 backgrounds. (A) Fluorescence signal from MuGam-PAmCherry at 0.003% L-arabinose:  
 926 Maximum projections over 100 ms x 200 frames showing MuGam-PAmCherry foci. From left  
 927 to right: MuGam signal after 2 h treatment with ciprofloxacin, ciprofloxacin +  
 928 DMSO, trimethoprim, trimethoprim + DMSO, no damage. (B) Percentage of cells  
 929 containing MuGam foci: 0 foci (light grey), 1 focus (grey), 2-4 foci (amber) and > 4 foci (red).  
 930 Cells were treated with ciprofloxacin ( $n = 125$ ), ciprofloxacin + DMSO ( $n = 127$ ), trimethoprim  
 931 ( $n = 138$ ), trimethoprim + DMSO ( $n = 146$ ), or experienced no damage ( $n = 140$ ). (C) Mean  
 932 number of MuGam foci per cell. Cells were treated with ciprofloxacin ( $n = 125$ ), ciprofloxacin



933 + DMSO ( $n = 127$ ), trimethoprim ( $n = 138$ ), trimethoprim + DMSO ( $n = 146$ ), or experienced  
934 no damage ( $n = 140$ ). The error bars represent standard error of the mean over the number  
935 of cells. \* for  $p < 0.05$ ; \*\* for  $p < 0.01$ .

936

## Figure 4

### A DinB-YPet activity in *lexA(Def)*

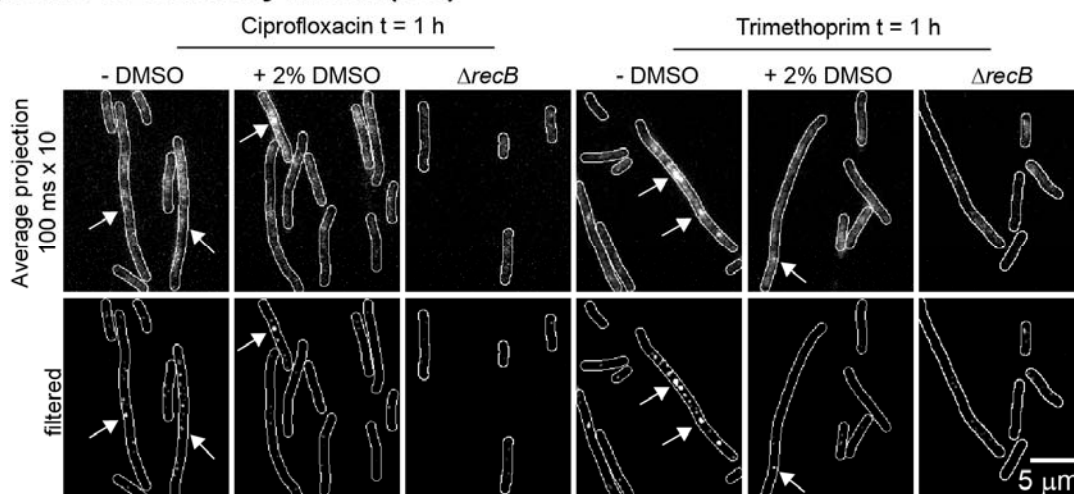

### B Percentage of cells containing pol IV foci

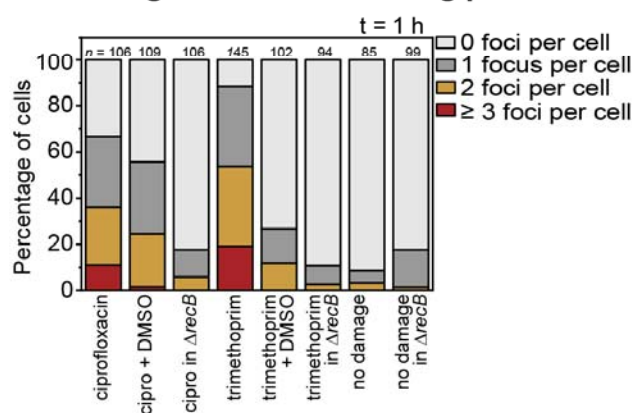

### C Mean pol IV foci per cell

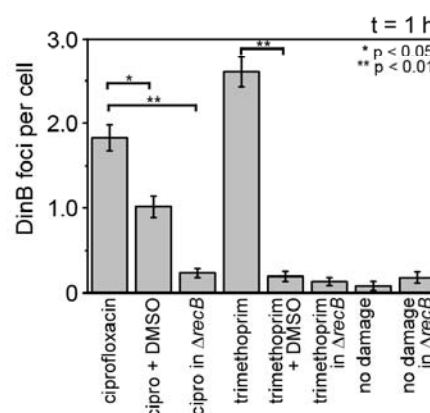

937

938 **Figure 4.** Number of pol IV foci per cell in *lexA(Def)* cells following ciprofloxacin or  
 939 trimethoprim treatment under normal conditions or ROS-mitigating conditions. (A) Upper  
 940 row: Average projection in time (100 ms x 10 frames) showing DinB-YPet (pol IV) foci.  
 941 Bottom row: Discoidal filtered projections. Cells were treated for 60 min prior to imaging. (B)  
 942 Percentage of cells containing pol IV foci: 0 foci (light grey), 1 focus (grey), 2 foci (amber)  
 943 and  $\geq 3$  foci (red). Cells were treated with ciprofloxacin ( $n = 106$ ), ciprofloxacin + DMSO ( $n =$   
 944  $109$ ), ciprofloxacin in  $\Delta recB$  ( $n = 106$ ), trimethoprim ( $n = 145$ ), trimethoprim + DMSO ( $n =$   
 945  $102$ ), trimethoprim in  $\Delta recB$  ( $n = 94$ ) experienced no damage for wild-type ( $n = 85$ ) and  
 946  $\Delta recB$  ( $n = 99$ ). (C) Number of DinB-YPet foci per cell. Error bars represent standard error of

947 the mean. Number of cells included in analysis:  $n(\text{ciprofloxacin}) = 106$ ,  $n(\text{ciprofloxacin-}$   
948  $\text{DMSO}) = 109$ ,  $n(\text{ciprofloxacin in } \Delta\text{recB}) = 106$ ,  $n(\text{trimethoprim}) = 145$ ,  $n(\text{trimethoprim-}$   
949  $\text{DMSO}) = 102$ ,  $n(\text{trimethoprim in } \Delta\text{recB}) = 94$ ,  $n(\text{untreated } \text{recB}^+) = 85$ ,  $n(\text{untreated } \Delta\text{recB}) =$   
950 99. \* for  $p < 0.05$ ; \*\* for  $p < 0.01$ .

951

## Figure 5

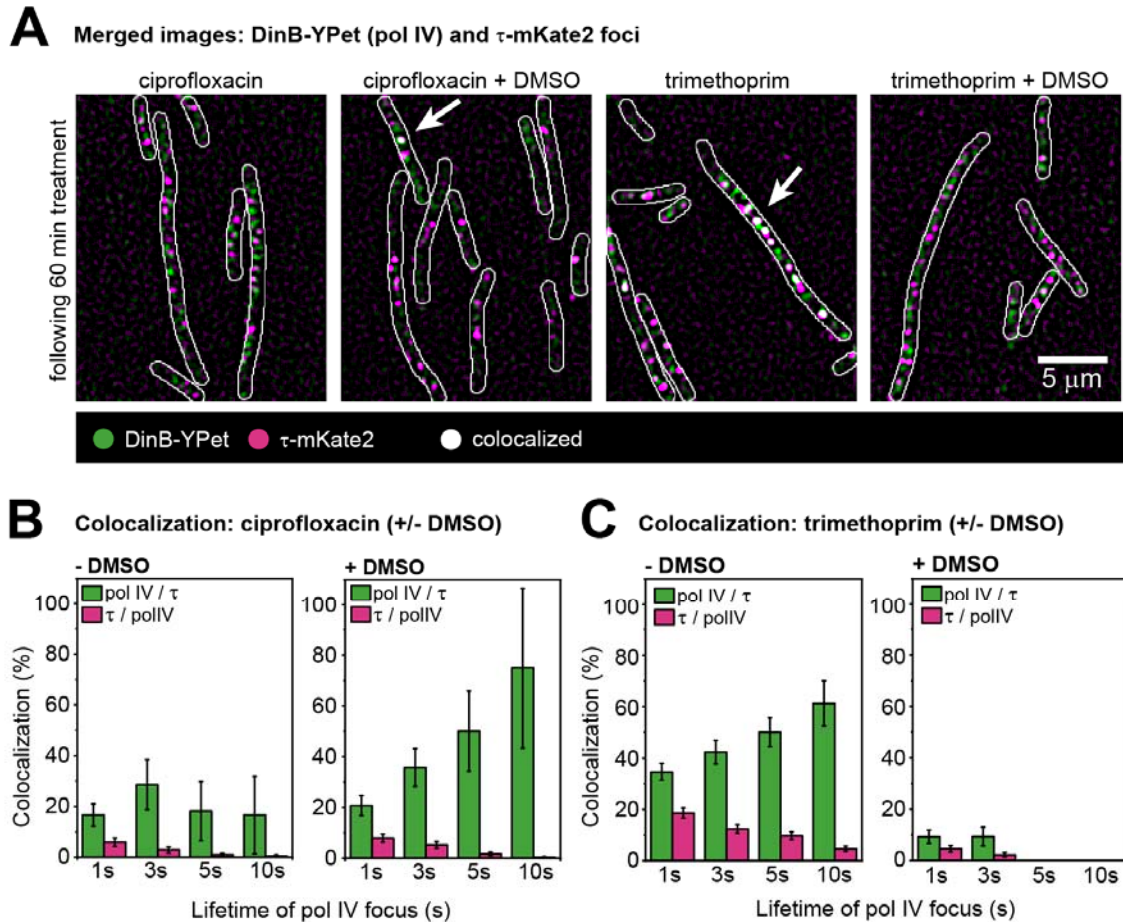

952

953 **Figure 5.** Measuring the colocalization of pol IV and replisomes following ciprofloxacin or  
 954 trimethoprim treatment  $\pm$  DMSO in *lexA(Def)* cells. (A) DinB-YPet activity at replisomes in  
 955 *lexA(Def)* cells. Cells were treated for 60 min prior to imaging. Merged images showing  
 956 DinB-YPet foci in green and  $\tau$ -mKate2 foci in magenta following ciprofloxacin-alone,  
 957 ciprofloxacin-DMSO, trimethoprim-alone and trimethoprim-DMSO treatment (from left to  
 958 right). White arrow points at colocalization event (white focus). Scale bar represents 5  $\mu$ m.  
 959 (B) Colocalization percentages of pol IV foci that bind at replisomes (green bars) and  
 960 colocalization percentages of replisomes that contain a pol IV focus (magenta bars) for cells  
 961 treated with ciprofloxacin-alone (left) or ciprofloxacin-DMSO (right). Colocalization was  
 962 measured with sets of pol IV foci that last 1, 3, 5 and 10 s. Error bars represent the standard  
 963 error of the mean. (C) Colocalization percentages of pol IV foci that bind at replisomes

964 (green bars) and colocalization percentages of replisomes that contain a pol IV focus  
965 (magenta bars) for cells treated with trimethoprim-alone (left) or trimethoprim-DMSO (right).  
966 Colocalization was measured with sets of pol IV foci that last 1, 3, 5 and 10 s. Error bars  
967 represent the standard error of the mean.

968 **Tables**

969 Table 1. Strains used in this study.

970

971 **Supplementary Information Text**

972 **Sequence of pBAD-MuGam-PAmCherry (pEAW1162).**

973 AAGAAACCAATTGTCCATATTGCATCAGACATTGCCGTCCTACTGCGTCTTTTACTGGCTCT  
974 TCTCGCTAACCAAAACCGGTAACCCCGCTTATTAAGCATTCTGTAACAAAGCGGGACC  
975 AAAGCCATGACAAAAACGCGTAACAAAAGTGTCTATAATCACGGCAGAAAAGTCCACAT  
976 TGATTATTTGCACGGCGTCACACTTTGCTATGCCATAGCATTATTTATCCATAAGATTAGC  
977 GGATCCTACCTGACGCTTTTATCGCAACTCTCTACTGTTTCTCCATACCCGTTTTTTGG  
978 GCTAACAGGAGGAATTAACATATGGCTAAACCAGCAAACGTATCAAGAGTGCCGCAG  
979 CGGCTTATGTGCCACAAAACCGCGATGCGGTGATTACCGATATTAACGCATCGGGGA  
980 TTTACAGCGCGAAGCATCACGTCTGGAAACGGAAATGAATGATGCCATCGCGGAAATTA  
981 CGGAGAAATTTGCGGCCCGGATTGCACCGATTAAAACCGATATTGAAACCCTTTCAAAA  
982 GGCGTTTCAAGGATGGTGTGAAGCGAACCGCGACGAACTGACGAACGGCGGCAAAGTG  
983 AAGACGGCGAATCTTGTACCCGGTGTATGTATCGTGGCGGGTCCGTCCACCATCAGTAA  
984 GTATTCGTGGTATGGATGCAGTGTGAAACGCTGGAGCGTCTTGGCCTGCAACGCTT  
985 TATTCGCACGAAGCAGGAAATCAACAAGGAAGCGATTTTACTGGAACCGAAAGCGGTC  
986 GCAGGCGTTGCCGGAATTACAGTTAAATCAGGCATTGAGGATTTTTCTATTATTCCATTT  
987 GAACAGGAAGCCGGTATTTCCGCTGGCTCCGCTGCTGGTTCTGGCGAATTCATGGTGA  
988 GCAAGGGCGAGGAGGATAACATGGCCATCATTAAAGGAGTTCATGCGCTTCAAGGTGCA  
989 CATGGAGGGTCCGTGAACGGCCACGTGTTTCGAGATCGAGGGCGAGGGCGAGGGCC  
990 GCCCCTACGAGGGCACCCAGACCGCCAAGCTGAAGGTGACCAAGGGTGGCCCCCTGC  
991 CCTTCACCTGGGACATCCTGTCCCCTCAATTCATGTACGGCTCCAATGCCTACGTGAAG  
992 CACCCCGCCGACATCCCGACTACTTTAAGCTGTCTTCCCGAGGGCTTCAAGTGGG  
993 AGCGCGTGATGAAATTCGAGGACGGCGGCGTGGTGACCGTGACCCAGGACTCCTCCC  
994 TGCAGGACGGTGAGTTCATCTACAAGGTGAAGCTGCGCGGCACCAACTTCCCCTCCGA  
995 CGGCCCGTAATGCAGAAGAAGACCATGGGCTGGGAGGCCCTCTCCGAGCGGATGTA  
996 CCCCGAGGACGGCGCCCTGAAGGGCGAGGTCAAGCCGAGAGTGAAGCTGAAGGACG  
997 GCGGCCACTACGACGCTGAGGTCAAGACCACCTACAAGGCCAAGAAGCCCGTGCAGC  
998 TGCCCGGCGCCTACAACGTCAACCAGGTTGGACATCACCTCACACAACGAGGACTA  
999 CACCATCGTGAACAGTACGAACGTGCCGAGGGCCGCCACTCCACCGGCGGCATGGA  
1000 CGAGCTGTACAAGTAAAAGCTTGGGCCCGAACAAAACCTCATCTCAGAAGAGGATCTG  
1001 AATAGCGCCGTCGACCATCATCATCATCATTGAGTTTAAACGGTCTCCAGCTTGGC  
1002 TGTTTTGGCGGATGAGAGAAGATTTTCAGCCTGATACAGATTAATCAGAACGCAGAAG  
1003 CGGTCTGATAAAACAGAATTTGCCTGGCGGCAGTAGCGCGGTGGTCCCACCTGACCCC  
1004 ATGCCGAACCTCAGAAGTGAACGCCGCTAGCGCCGATGGTAGTGTGGGGTCTCCCATG  
1005 CGAGAGTAGGGAACCTGCCAGGCATCAAATAAAACGAAAGGCTCAGTCGAAAGACTGGG  
1006 CCTTTCGTTTTATCTGTTGTTGTGCGGTGAACGCTCTCCTGAGTAGGACAAATCCGCCG  
1007 GGAGCGGATTTGAACGTTGCGAAGCAACGGCCCGGAGGGTGGCGGGCAGGACGCC  
1008 GCCATAAACTGCCAGGCATCAAATTAAGCAGAAGGCCATCCTGACGGATGGCCTTTTTG  
1009 CGTTTCTACAACTCTTTTGTATTTTTCTAAATACATTCAAATATGTATCCGCTCATGA  
1010 GACAATAACCCTGATAAATGCTTCAATAATATTGAAAAAGGAAGAGTATGAGTATTCAAC  
1011 ATTTCCGTGTCGCCCTTATTCCCTTTTTTGCGGCATTGCTTCCCTGTTTTGCTCACC  
1012 CAGAAACGCTGGTGAAAGTAAAAGATGCTGAAGATCAGTTGGGTGCACGAGTGGGTTA  
1013 CATCGAACTGGATCTCAACAGCGGTAAGATCCTTGAGAGTTTTCGCCCCGAAGAAGCTT  
1014 TTCCAATGATGAGCACTTTTAAAGTTCTGCTATGTGGCGCGGTATTATCCCGTGTGAC  
1015 GCCGGGCAAGAGCAACTCGGTCGCCGCATACACTATTCTCAGAATGACTTGGTTGAGT  
1016 ACTCACCAGTCACAGAAAAGCATCTTACGGATGGCATGACAGTAAGAGAATTATGCAGT  
1017 GCTGCCATAACCATGAGTGATAACACTGCGGCCAACTTACTTCTGACAACGATCGGAG  
1018 GACCGAAGGAGCTAACCGCTTTTTTGCACAACATGGGGGATCATGTAACCTGCCTTGAT  
1019 CGTTGGGAACCGGAGCTGAATGAAGCCATACCAAACGACGAGCGTGACACCACGATG  
1020 CCTGTAGCAATGGCAACAACGTTGCGCAAACCTAATACTGGCGAACTACTTACTCTAGC  
1021 TTCCCGGCAACAATTAATAGACTGGATGGAGGCGGATAAAGTTGCAGGACCCTTCTG  
1022 CGCTCGGCCCTTCCGGCTGGCTGGTTTATTGCTGATAAATCTGGAGCCGGTGAGCGTG  
1023 GGTCTCGCGGTATCATTGCAGCACTGGGGCCAGATGGTAAGCCCTCCCGTATCGTAGT  
1024 TATCTACACGACGGGGAGTCAGGCAACTATGGATGAACGAAATAGACAGATCGCTGAG

1025 ATAGGTGCCTCACTGATTAAGCATTGGTAACTGTCAGACCAAGTTTACTCATATATACTT  
1026 TAGATTGATTTAAAACCTTCATTTTTAATTTAAAAGGATCTAGGTGAAGATCCTTTTTGATA  
1027 ATCTCATGACCAAATCCCTTAACGTGAGTTTTTCGTTCCACTGAGCGTCAGACCCCGTA  
1028 GAAAAGATCAAAGGATCTTCTTGAGATCCTTTTTTCTGCGCGTAATCTGCTGCTTGCAA  
1029 ACAAAAAAACCACCGCTACCAGCGGTGGTTTGTGGCCGGATCAAGAGCTACCAACTCT  
1030 TTTTCCGAAGGTAAGTGGCTTCAGCAGAGCGCAGATACCAAATACTGTCTTCTAGTGT  
1031 AGCCGTAGTTAGGCCACCACTTCAAGAACTCTGTAGCACCGCCTACATACCTCGCTCTG  
1032 CTAATCCTGTTACCAGTGGCTGCTGCCAGTGGCGATAAGTCGTGTCTTACCGGGTTGG  
1033 ACTCAAGACGATAGTTACCGGATAAGGCGCAGCGGTCCGGCTGAACGGGGGGTTCGT  
1034 GCACACAGCCCAGCTTGGAGCGAACGACCTACACCGAACTGAGATACCTACAGCGTGA  
1035 GCTATGAGAAAGCGCCACGCTTCCCGAAGGGAGAAAGGCGGACAGGTATCCGGTAAG  
1036 CGGCAGGGTTCGGAACAGGAGAGCGCACGAGGGAGCTTCCAGGGGGAAACGCCTGGT  
1037 ATCTTTATAGTCTGTCCGGTTTCGCCACCTCTGACTTGAGCGTCGATTTTTGTGATGCT  
1038 CGTCAGGGGGGCGGAGCCTATGGAAAACGCCAGCAACGCGGCCTTTTACGGTTCC  
1039 TGGCCTTTTGTGGCCTTTTGTCTACATGTTCTTTCCTGCGTTATCCCCTGATTCTGTGG  
1040 ATAACCGTATTACCGCCTTTGAGTGAGCTGATACCGCTCGCCGCAGCCGAACGACCGA  
1041 GCGCAGCGAGTCAGTGAGCGAGGAAGCGGAAGAGCGCCTGATGCGGTATTTTCTCCT  
1042 TACGCATCTGTGCGGTATTTACACCCGCATAtaTGGTGCACCTCTCAGTACAATCTGCTCT  
1043 GATGCCGCATAGTTAAGCCAGTATACACTCCGCTATCGCTACGTGACTGGGTGATGCC  
1044 TGCGCCCCGACACCCGCCAACACCCGCTGACGCGCCCTGACGGGCTTGTCTGCTCCC  
1045 GGCATCCGCTTACAGACAAGCTGTGACCGTCTCCGGGAGCTGCATGTGTGAGAGGTTT  
1046 TCACCGTCATCACCGAAACGCGCGAGGCAGCAGATCAATTCGCGCGCGAAGGCCGAAG  
1047 CGGCATGCATAATGTGCCTGTCAAATGGACGAAGCAGGGATTCTGCAAACCCTATGCT  
1048 ACTCCGTCAAGCCGTCAATTGTCTGATTCTGTTACCAATTATGACAACTTGACGGCTACAT  
1049 CATTCACTTTTTCTTACAACCCGGCACGGAACCTCGCTCGGGCTGGCCCCGGTGCATTTT  
1050 TTAAATACCCGCGAGAAATAGAGTTGATCGTCAAACCAACATTGCGACCGACGGTGG  
1051 CGATAGGCATCCGGGTGGTGTCTAAAAGCAGCTTTCGCCTGGCTGATACGTTGGTCCTC  
1052 GCGCCAGCTTAAGACGCTAATCCCTAAGTGTGGCGGAAAAGATGTGACAGACGCGAC  
1053 GGCGACAAGCAAACATGCTGTGCGACGCTGGCGATATCAAATTGCTGTCTGCCAGGT  
1054 GATCGCTGATGTACTGACAAGCCTCGCGTACCCGATTATCCATCGGTGGATGGAGCGA  
1055 CTCGTTAATCGCTTCCATGCGCCGCAGTAACAATTGCTCAAGCAGATTTATCGCCAGCA  
1056 GCTCCGAATAGCGCCCTTCCCCTTGCCCGCGTTAATGATTTGCCAAACAGGTCGCT  
1057 GAAATGCGGCTGGTGCCTTTCATCCGGGCGAAAGAACCCTGATTGGCAAATATTGAC  
1058 GGCCAGTTAAGCCATTTCATGCCAGTAGGCGCGCGGACGAAAGTAAACCCACTGGTGAT  
1059 ACCATTGCGGAGCCTCCGGATGACGACCGTAGTGATGAATCTCTCCTGGCGGGAACAG  
1060 CAAAATATCACCCGGTCCGGCAAACAAATTCTCGTCCCTGATTTTTACCCACCCCTGAC  
1061 CGCGAATGGTGAAGATTGAGAATATAACCTTTTATTCCAGCGGTGGTTCGATAAAAAAA  
1062 TCGAGATAACCGTTGGCCTCAATCGGCGTTAAACCCGCCACCAGATGGGCATTAAACG  
1063 AGTATCCCGGCAGCAGGGGATCATTTTTGCGCTTCAGCCATACTTTTCATACTCCCGCCA  
1064 TTCAGAG  
1065

# S1 Appendix Figure 1

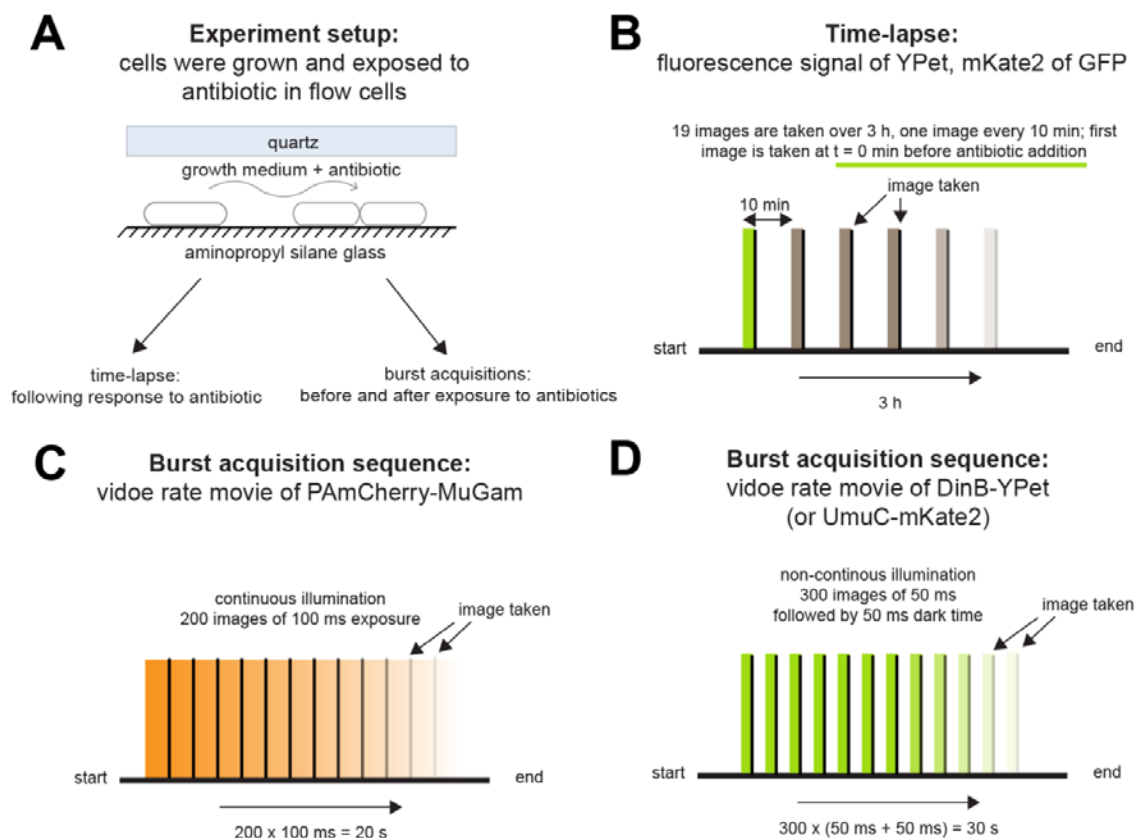

1066  
1067

1068 **Fig. S1.** Experimental design. (A) Experimental setup. Cells are loaded in a flow-cell and  
1069 immobilized on a positively charged aminopropyl silane glass surface. Cells were imaged  
1070 before and after antibiotic exposure  $\pm$  ROS mitigator. Time-lapse movies were recorded to  
1071 follow the cellular response. Burst acquisitions were recorded to follow the dynamic behavior  
1072 of fluorescent protein fusion constructs in cells. (B) Time-lapse movies were recorded over 3  
1073 h following the cellular response to antibiotic exposure. An image was taken every 10 min. At  
1074  $t = 0$  min, the first image was taken and subsequently antibiotic-containing media was flowed  
1075 into the flow cell. A total number of 19 frames were recorded. (C) Burst acquisition videos  
1076 were recorded at specific time-points before or after antibiotic addition. Movies of MuGam-  
1077 PAmCherry were recorded using continuous excitation, containing 200 frames at 100 ms  
1078 exposure. (D) Burst acquisition movies of DinB-YPet or UmuC-mKate2 were recorded using  
1079 non-continuous excitation, containing 300 frames at 50 ms exposure followed by 50 ms dark  
1080 time.  
1081



## SI Appendix Figure 2

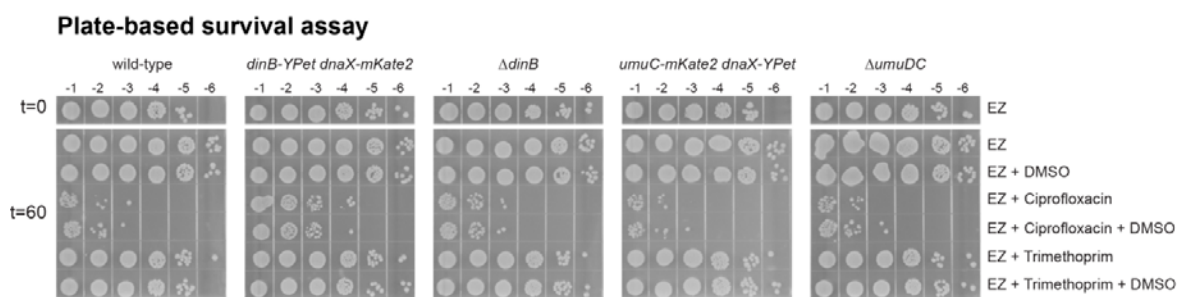

1083 **Fig. S2.** Survival of strains to ciprofloxacin and trimethoprim in EZ medium. Survival assays  
1084 using ciprofloxacin or trimethoprim normal or ROS-mitigating condition (+ DMSO). Cell  
1085 cultures (MG1655 [wild-type], *dinB*-YPet *dnaX*-mKate2,  $\Delta$ *dinB*, *umuC*-mKate2 *dnaX*-YPet  
1086 and  $\Delta$ *umuDC*) were grown in EZ glucose medium to exponential growth phase ( $OD_{600} = 0.2$ -  
1087 0.3). Then, culture were split in 6 before, one sample was used as control, 2% DMSO, 30  
1088 ng/mL ciprofloxacin, 30 ng/mL ciprofloxacin + DMSO, 1  $\mu$ g/mL trimethoprim or 1  $\mu$ g/mL  
1089 trimethoprim + 2% DMSO were added in the others and grown for 60 min. Before the  
1090 treatment and after 60 min samples were taken and serial diluted by factor ten down to  $10^{-6}$ .  
1091 Dilutions  $10^{-1}$  to  $10^{-6}$  of each culture were spotted on fresh LB plates, incubated in the dark  
1092 overnight at 37°C before the image were captured. Images selected are representative of a  
1093 biological triplicate. Cells constructs used in this study (*dinB*-YPet *dnaX*-mKate2 and *umuC*-  
1094 *mKate2* *dnaX*-YPet) exhibit a similar phenotype to MG1655.  
1095



1099 added to each well at the beginning of the experiment. Measurements of absorbance  
1100 ( $OD_{600}$ ) and fluorescence intensity (a.u.) were carried out every 30 min over 17 h. For (A)-  
1101 (C): upper row shows absorbance ( $OD_{600}$ ) and bottom row illustrates intensity values/  $OD_{600}$ ,  
1102 consistent with expression levels. Error bars represent standard error of the mean over three  
1103 independent biological replicates. (A) *sodA* is regulated by SoxRS. Superoxides oxidize the  
1104 Fe-S clusters of the SoxR transcription factor, promoting transcription of *soxS* and *sodA*.  
1105 Then, SoxS also acts as a transcription factor for *sodA*. For cells carrying  $P_{sodA}$ -*gfp*,  
1106 superoxides then trigger the expression of GFP from the *sodA* promoter. (B) Comparison of  
1107 normal growth condition with ciprofloxacin treatment  $\pm$  ROS mitigator for wild-type cells. First  
1108 column: normal growth conditions (wild-type: dark grey;  $\Delta recB$ : orange) or + 2% DMSO  
1109 (wild-type: grey); second column: ciprofloxacin treatment of wild-type cells (5 ng/mL: black;  
1110 10 ng/mL: grey; 20 ng/mL: blue; 40 ng/mL: orange); third column: ciprofloxacin + 2% DMSO  
1111 treatment of wild-type cells (same color coding as second column). (C) Comparison of  
1112 normal growth condition with trimethoprim treatment  $\pm$  ROS mitigator for wild-type cells. First  
1113 column: as (A) first column; second column: trimethoprim treatment of wild-type cells (0.1  
1114  $\mu$ g/mL: black; 0.3  $\mu$ g/mL: grey; 1  $\mu$ g/mL: blue; 3  $\mu$ g/mL: orange); third column: trimethoprim +  
1115 2% DMSO treatment of wild-type cells (same color coding as second column). (D)  
1116 Comparison of normal growth condition with hydrogen peroxide ( $H_2O_2$ ) treatment  $\pm$  ROS  
1117 mitigator for wild-type cells. First column: as (A) first column; second column:  $H_2O_2$  treatment  
1118 of wild-type cells (30 mM: black; 100 mM: grey; 300 mM: blue; 500 mM: orange); third  
1119 column:  $H_2O_2$  + 2% DMSO treatment of wild-type cells (same color coding as second  
1120 column).

1121

## SI Appendix Figure 4

### A Fusion $P_{ahpC}$ -*gfp* - promoter of gene encoding the Alkyl hydroperoxidase

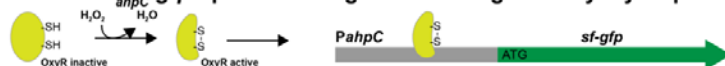

### B $P_{ahpC}$ -*gfp* expression levels in response to ciprofloxacin

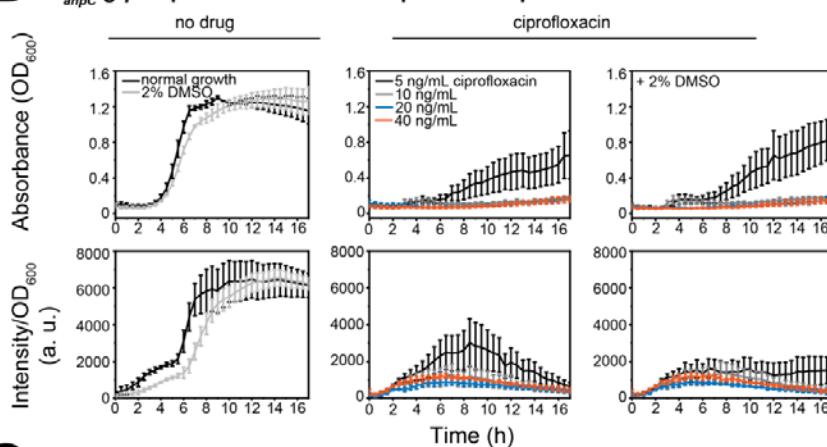

### C $P_{ahpC}$ -*gfp* expression levels in response to trimethoprim

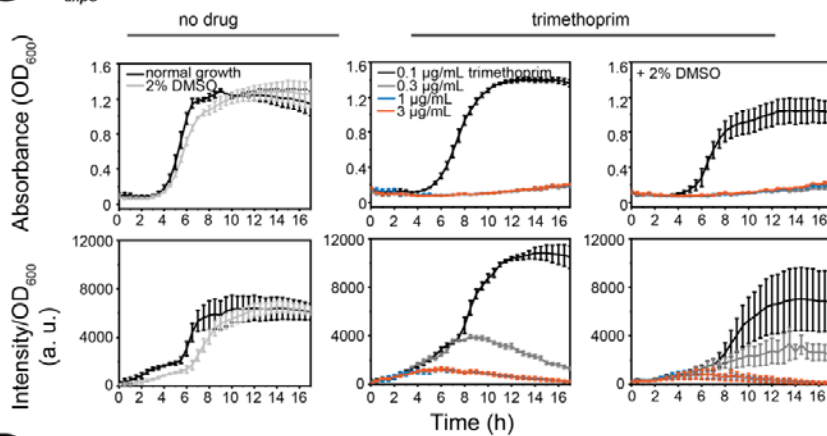

### D $P_{ahpC}$ -*gfp* expression levels in response to hydrogen peroxide ( $H_2O_2$ )

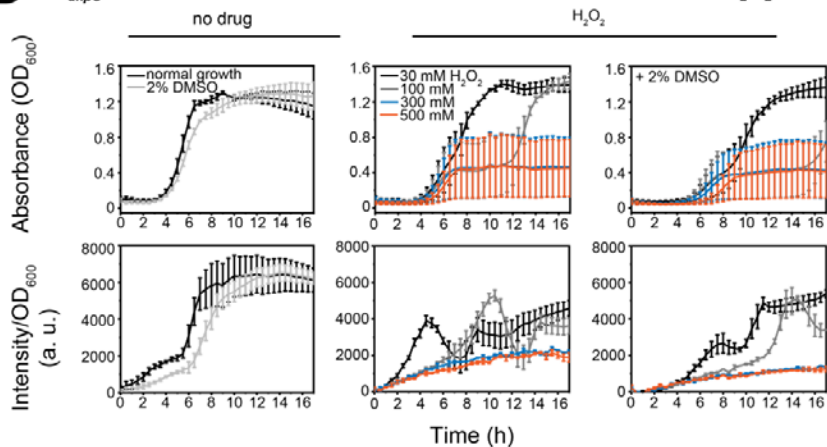

1122

1123 **Fig. S4.**  $P_{ahpC}$ -*gfp* expression levels wild-type cells. For each strain,  $10^4 - 10^6$  cells were  
 1124 added to each well at the beginning of the experiment. Measurements of absorbance

1125 (OD<sub>600</sub>) and fluorescence intensity (a.u.) were carried out every 30 min over 17 h. For (A)-  
1126 (C): upper row shows absorbance (OD<sub>600</sub>) and bottom row illustrates intensity values/ OD<sub>600</sub>,  
1127 consistent with expression levels. Error bars represent standard error of the mean over three  
1128 independent biological replicates. (A) *ahcP* is transcriptionally regulated by OxyR. Oxidation  
1129 of OxyR cysteines induces transcription and expression of *ahcPC*. For cells carrying P<sub>*ahcP*</sub>-  
1130 *gfp*, oxidative stress triggers the expression of GFP from the *ahcP* promoter. (B) Comparison  
1131 of normal growth condition with ciprofloxacin treatment ± ROS mitigator for wild-type cells.  
1132 First column: normal growth conditions (wild-type: dark grey;  $\Delta recB$ : orange) or + 2% DMSO  
1133 (wild-type: grey); second column: ciprofloxacin treatment of wild-type cells (5 ng/mL: black;  
1134 10 ng/mL: grey; 20 ng/mL: blue; 40 ng/mL: orange); third column: ciprofloxacin + 2% DMSO  
1135 treatment of wild-type cells (same color coding as second column). (C) Comparison of  
1136 normal growth condition with trimethoprim treatment ± ROS mitigator for wild-type cells. First  
1137 column: as (A) first column; second column: trimethoprim treatment of wild-type cells (0.1  
1138  $\mu$ g/mL: black; 0.3  $\mu$ g/mL: grey; 1  $\mu$ g/mL: blue; 3  $\mu$ g/mL: orange); third column: trimethoprim +  
1139 2% DMSO treatment of wild-type cells (same color coding as second column). (D)  
1140 Comparison of normal growth condition with hydrogen peroxide (H<sub>2</sub>O<sub>2</sub>) treatment ± ROS  
1141 mitigator for wild-type cells. First column: as (A) first column; second column: H<sub>2</sub>O<sub>2</sub> treatment  
1142 of wild-type cells (30 mM: black; 100 mM: grey; 300 mM: blue; 500 mM: orange); third  
1143 column: H<sub>2</sub>O<sub>2</sub> + 2% DMSO treatment of wild-type cells (same color coding as second  
1144 column).  
1145

## SI Appendix Figure 5

### A Fusion $P_{fepD}$ - $gfp$ - promoter of operon encoding the $Fe^{3+}$ -enterobactin transporter

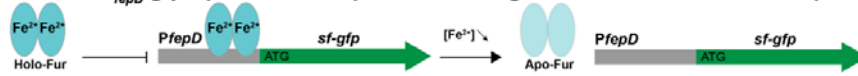

### B $P_{fepD}$ - $gfp$ expression levels in response to ciprofloxacin

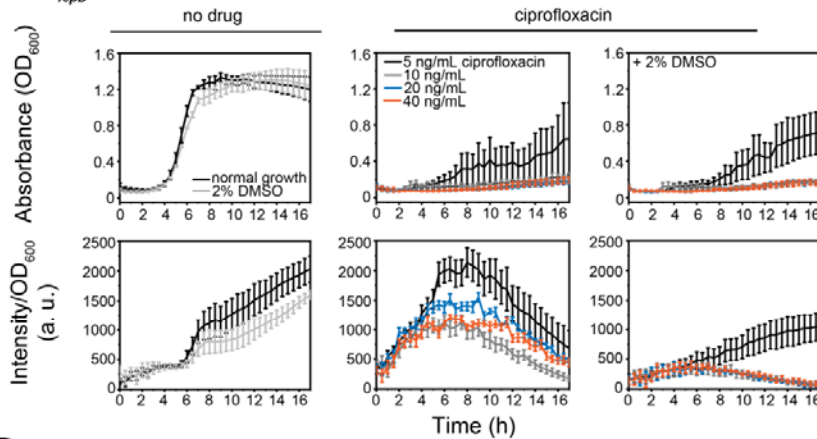

### C $P_{fepD}$ - $gfp$ expression levels in response to trimethoprim

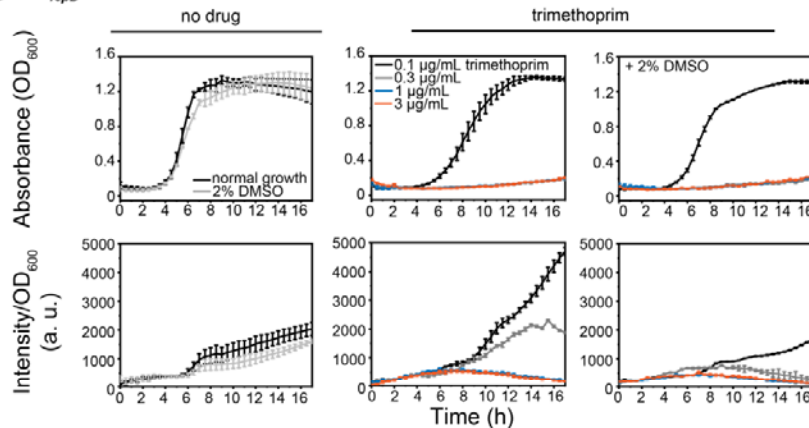

### D $P_{fepD}$ - $gfp$ expression levels in response to hydrogen peroxide ( $H_2O_2$ )

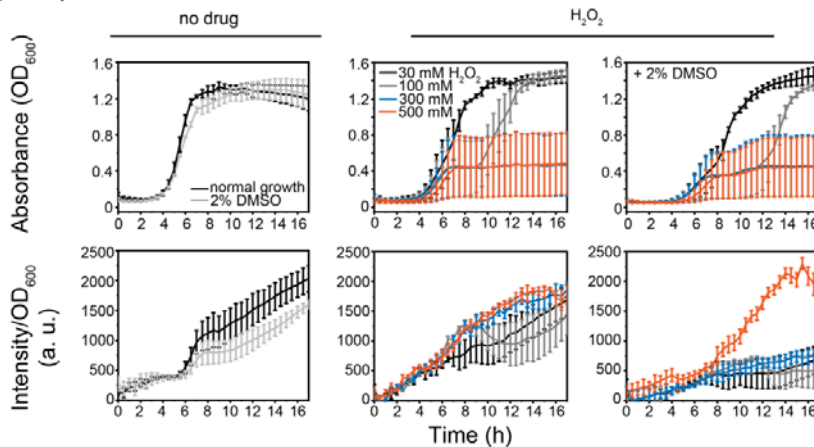

1146

1147 **Fig. S5.**  $P_{fepD}$ - $gfp$  expression levels wild-type cells. For each strain,  $10^4 - 10^6$  cells were  
 1148 added to each well at the beginning of the experiment. Measurements of absorbance

1149 (OD<sub>600</sub>) and fluorescence intensity (a.u.) were carried out every 30 min over 17 h. For (A)-  
1150 (C): upper row shows absorbance (OD<sub>600</sub>) and bottom row illustrates intensity values/ OD<sub>600</sub>,  
1151 consistent with expression levels. Error bars represent standard error of the mean over three  
1152 independent biological replicates. (A) *fepD* is regulated by Fur. Under high iron conditions,  
1153 transcriptional repressor Fur inhibits of *fepD* transcription. Under low iron conditions, in the  
1154 presence of oxidative damage, Fur is de-repressed and *fepD* is transcribed. For cells  
1155 carrying P<sub>*fepD*</sub>-*gfp*, oxidative stress triggers the expression of GFP from the *fepD* promotor.  
1156 (B) Comparison of normal growth condition with ciprofloxacin treatment ± ROS mitigator for  
1157 wild-type cells. First column: normal growth conditions (wild-type: dark grey;  $\Delta$ *recB*: orange)  
1158 or + 2% DMSO (wild-type: grey); second column: ciprofloxacin treatment of wild-type cells (5  
1159 ng/mL: black; 10 ng/mL: grey; 20 ng/mL: blue; 40 ng/mL: orange); third column: ciprofloxacin  
1160 + 2% DMSO treatment of wild-type cells (same color coding as second column). (C)  
1161 Comparison of normal growth condition with trimethoprim treatment ± ROS mitigator for wild-  
1162 type cells. First column: as (A) first column; second column: trimethoprim treatment of wild-  
1163 type cells (0.1 µg/mL: black; 0.3 µg/mL: grey; 1 µg/mL: blue; 3 µg/mL: orange); third column:  
1164 trimethoprim + 2% DMSO treatment of wild-type cells (same color coding as second  
1165 column). (D) Comparison of normal growth condition with hydrogen peroxide (H<sub>2</sub>O<sub>2</sub>)  
1166 treatment ± ROS mitigator for wild-type cells. First column: as (A) first column; second  
1167 column: H<sub>2</sub>O<sub>2</sub> treatment of wild-type cells (30 mM: black; 100 mM: grey; 300 mM: blue; 500  
1168 mM: orange); third column: H<sub>2</sub>O<sub>2</sub> + 2% DMSO treatment of wild-type cells (same color  
1169 coding as second column).  
1170

## SI Appendix Figure 6

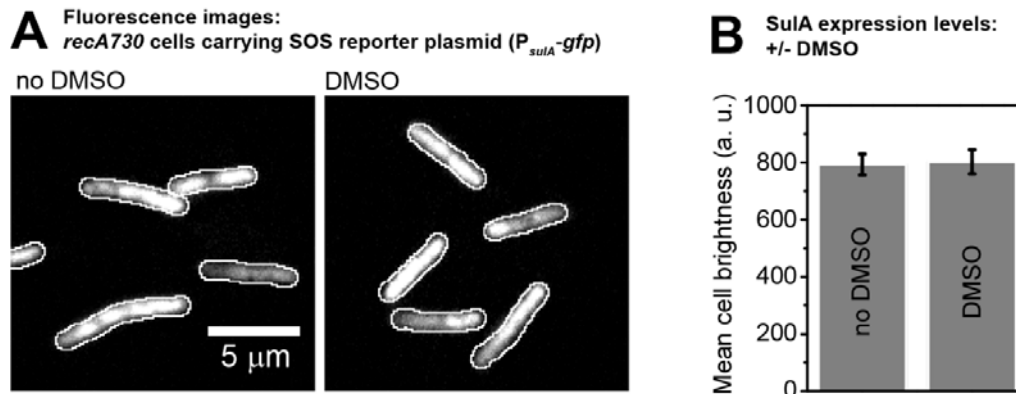

1171

1172 **Fig. S6.** DMSO has no effect on GFP fluorescence *in vivo*. (A) Fluorescence images of  
1173 *recA730* cells carrying the SOS reporter plasmid ( $P_{sulA}$ -*gfp*) in the absence of DMSO (left)  
1174 and in the presence of DMSO (right). Scale bar represents 5  $\mu$ m. (B) SulA expression levels.  
1175 Mean cell brightness is plotted for *recA730* cells grown in the absence and presence of  
1176 DMSO. Error bars represent standard error of the mean from  $n > 100$  cells.

1177



## SI Appendix Figure 7

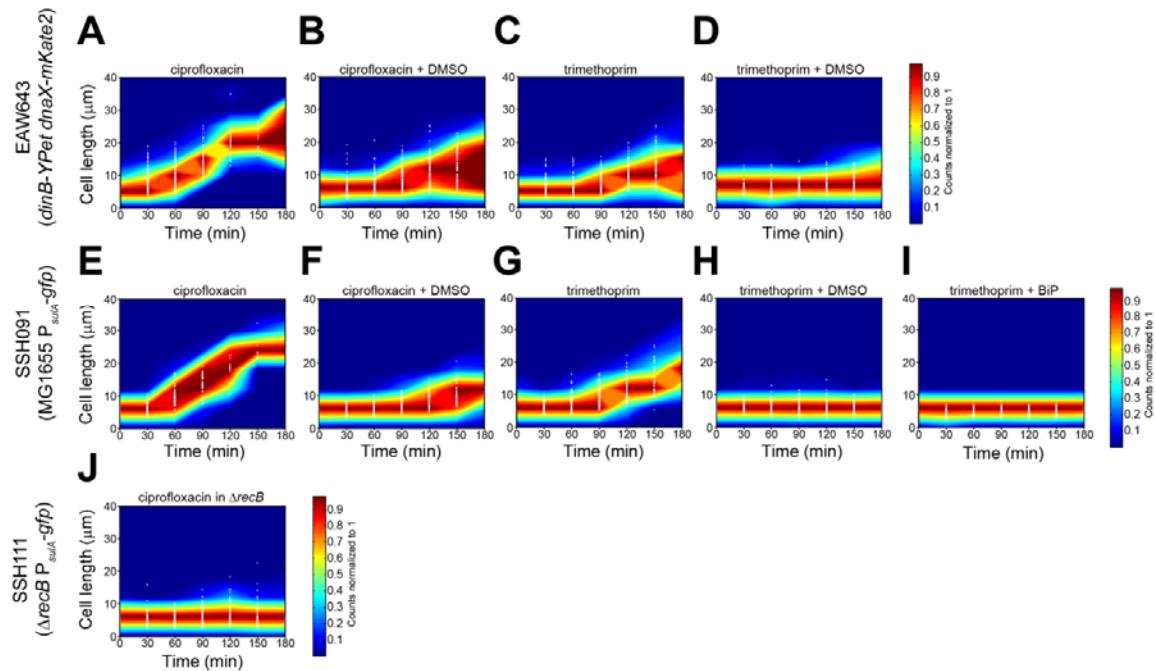

1178

1179

1180 **Fig. S7.** Scatter plots of cell-size from time-lapse imaging. White points indicate individual  
1181 data-points, while blue-to-red contours indicate frequencies of observations. Blue areas  
1182 indicate regions of the plot containing few data points; red areas indicate regions containing  
1183 a large number of data points. Frequencies were normalized at each time-point to the  
1184 maximum value at that time-point with dark blue = 0 and dark red = 1. We conservatively  
1185 estimate that >100 cells were used in each measurement. (A) EAW643 cells (*dinB-YPet*  
1186 *dnaX-mKate2*) treated with ciprofloxacin-alone. (B) EAW643 cells (*dinB-YPet dnaX-mKate2*)  
1187 treated with ciprofloxacin-DMSO. (C) EAW643 cells (*dinB-YPet dnaX-mKate2*) treated with  
1188 trimethoprim-alone. (D) EAW643 cells (*dinB-YPet dnaX-mKate2*) treated with trimethoprim-  
1189 DMSO. (E) SSH091 cells (MG1655  $P_{sulA}$ -*gfp*) treated with ciprofloxacin-alone. (F) SSH091  
1190 cells (MG1655  $P_{sulA}$ -*gfp*) treated with ciprofloxacin-DMSO. (G) SSH091 cells (MG1655  $P_{sulA}$ -  
1191 *gfp*) treated with trimethoprim-alone. (H) SSH091 cells (MG1655  $P_{sulA}$ -*gfp*) treated with  
1192 trimethoprim-DMSO. (I) SSH091 cells (MG1655  $P_{sulA}$ -*gfp*) treated with trimethoprim-BiP. (J)  
1193 SSH111 cells ( $\Delta recB$   $P_{sulA}$ -*gfp*) treated with ciprofloxacin.

1194

## SI Appendix Figure 8

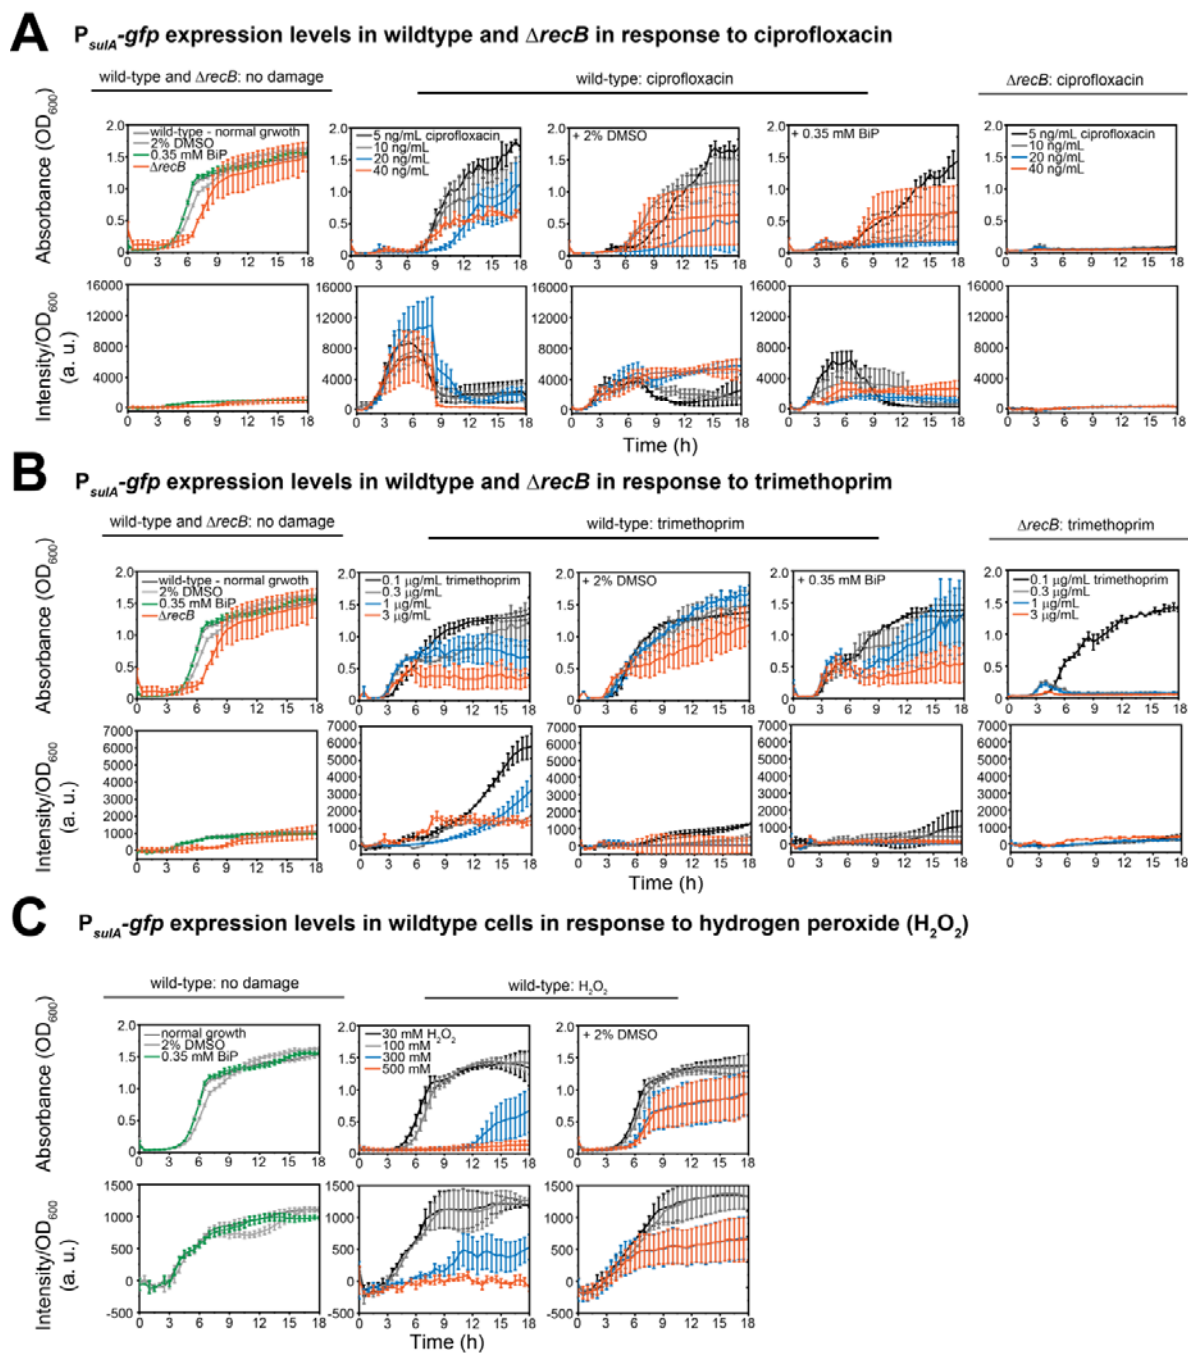

1195

1196

1197 **Fig. S8.**  $P_{suaA}$ -*gfp* expression levels in wild-type and  $\Delta recB$  cells. For each strain,  $10^4 - 10^6$   
 1198 cells were added to each well at the beginning of the experiment. Measurements of absorbance ( $OD_{600}$ ) and fluorescence intensity (a.u.) were carried out every 30 min over 18  
 1199 h. For (A)-(C): upper row shows absorbance ( $OD_{600}$ ) and bottom row illustrates intensity  
 1200 values/  $OD_{600}$ , consistent with expression levels. Error bars represent standard error of the  
 1201 mean over three independent biological replicates. (A) Comparison of normal growth  
 1202

1203 condition with ciprofloxacin treatment  $\pm$  ROS mitigator for wild-type cells or  $\Delta recB$ . First  
1204 column: normal growth conditions (wild-type: dark grey;  $\Delta recB$ : orange), + 2% DMSO (wild-  
1205 type: grey) or 0.35 mM BiP (wild-type: green); second column: ciprofloxacin treatment of  
1206 wild-type cells (5 ng/mL: black; 10 ng/mL: grey; 20 ng/mL: blue; 40 ng/mL: orange); third  
1207 column: ciprofloxacin + 2% DMSO treatment of wild-type cells (same color coding as second  
1208 column); forth column: ciprofloxacin + 0.35 mM BiP treatment of wild-type cells (same color  
1209 coding as second column); fifth column: ciprofloxacin treatment of  $\Delta recB$  cells (same color  
1210 coding as second column). (B) Comparison of normal growth condition with trimethoprim  
1211 treatment  $\pm$  ROS mitigator for wild-type cells or  $\Delta recB$ . First column: as (A) first column;  
1212 second column: trimethoprim treatment of wild-type cells (0.1  $\mu\text{g/mL}$ : black; 0.3  $\mu\text{g/mL}$ : grey;  
1213 1  $\mu\text{g/mL}$ : blue; 3  $\mu\text{g/mL}$ : orange); third column: trimethoprim + 2% DMSO treatment of wild-  
1214 type cells (same color coding as second column); forth column: trimethoprim + 0.35 mM BiP  
1215 treatment of wild-type cells (same color coding as second column); fifth column: trimethoprim  
1216 treatment of  $\Delta recB$  cells (same color coding as second column). (C) Comparison of normal  
1217 growth condition with hydrogen peroxide ( $\text{H}_2\text{O}_2$ ) treatment  $\pm$  ROS mitigator for wild-type  
1218 cells. First column: as (A) first column; second column:  $\text{H}_2\text{O}_2$  treatment of wild-type cells (30  
1219 mM: black; 100 mM: grey; 300 mM: blue; 500 mM: orange); third column:  $\text{H}_2\text{O}_2$  + 2% DMSO  
1220 treatment of wild-type cells (same color coding as second column).

1221

## SI Appendix Figure 9

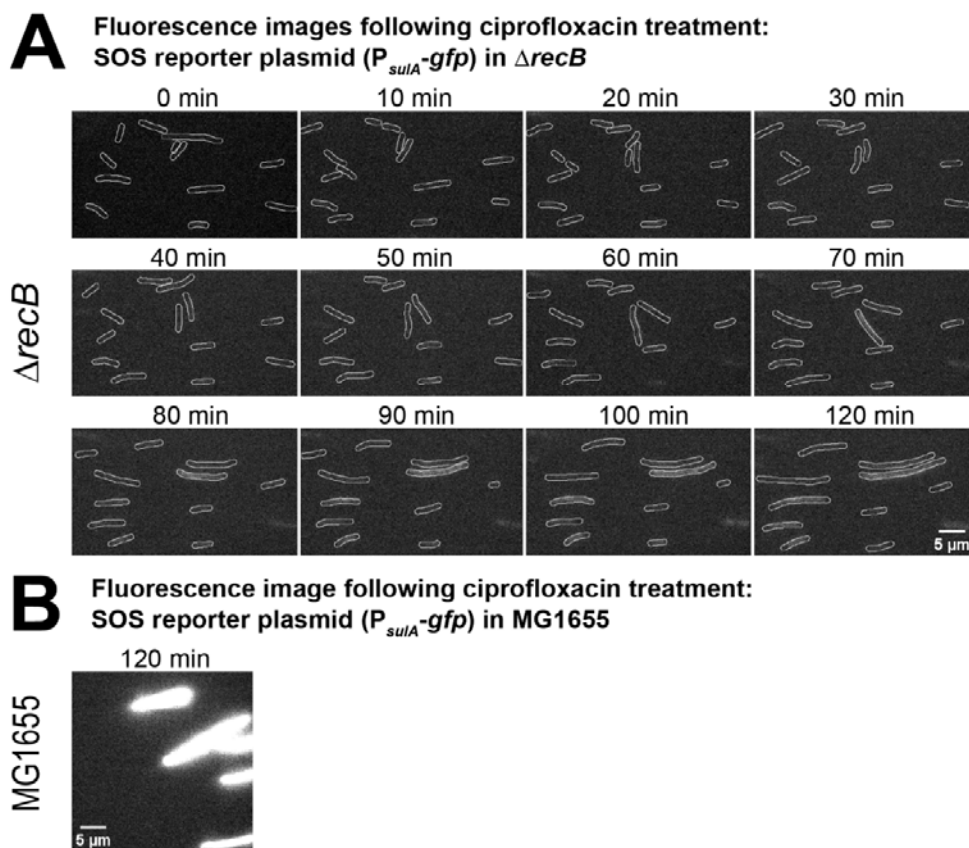

1222

1223

1224 **Fig. S9.**  $P_{sulA}$ -*gfp* expression levels following ciprofloxacin-alone treatment in  $\Delta recB$  vs.  
1225 MG1655 (wild-type). (A) Fluorescence images showing the expression of GFP from a SOS  
1226 reporter plasmid ( $P_{sulA}$ -GFP) from 0-110 min at intervals of 10 min and 120 min after  
1227 ciprofloxacin addition in  $\Delta recB$ . Scale bar represents 5  $\mu$ m. (B) Fluorescence images  
1228 showing the expression of GFP from a SOS reporter plasmid ( $P_{sulA}$ -GFP) at 120 min after  
1229 ciprofloxacin addition in wild-type cells, MG1655. Scale bar represents 5  $\mu$ m.

1230

## SI Appendix Figure 10

### Survival plates for different MuGam-PAmCherry expression levels

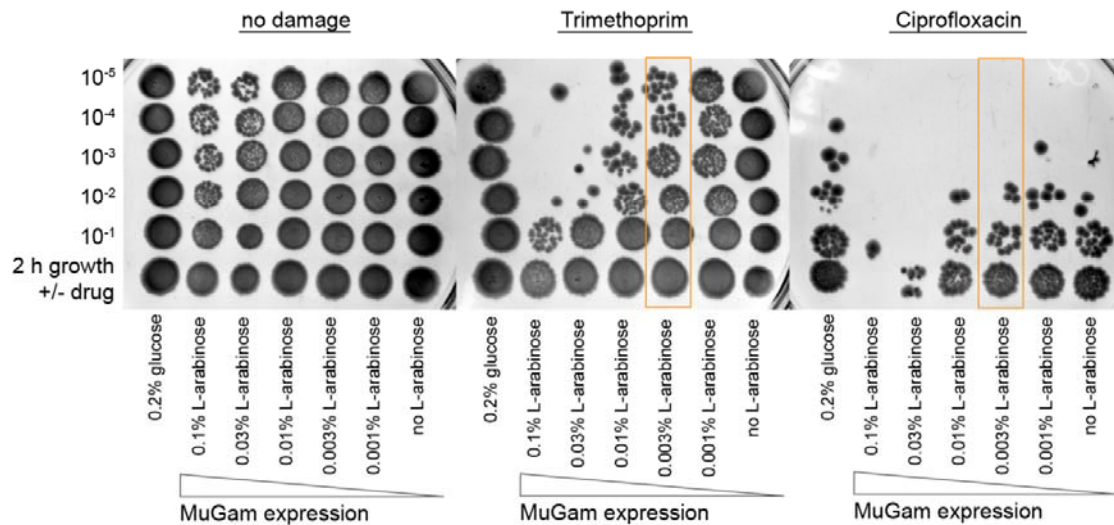

1231

1232 **Fig. S10.** Plate-based survival assays using ciprofloxacin or trimethoprim at different  
1233 MuGam-PAmCherry expression levels. Cells carrying a pBAD plasmid for MuGam-  
1234 PAmCherry expression were grown in EZ glycerol in the presence of ampicillin at different L-  
1235 arabinose concentrations (0, 0.001, 0.003, 0.01, 0.03, 0.1% wt/vol) or in EZ glucose in order  
1236 to inhibit expression from the pBAD plasmid. These cultures were split in three to  
1237 perform two survival assays and a 'no damage' control. For the survival assays, antibiotic  
1238 was added to these cultures (30 ng/mL ciprofloxacin or 1  $\mu$ g/mL trimethoprim), then, cell  
1239 cultures were grown for 2 h. For the control, cells were grown in the absence of antibiotic for  
1240 2 h. After 2 h of growth, cultures were centrifuged and resuspended in glucose or glycerol  
1241 containing media (x 3) to remove the antibiotic. These cultures were serial diluted in PBS by  
1242 factor ten down to  $10^{-5}$  and spotted onto LB agar plates containing 100  $\mu$ g/mL ampicillin. At  
1243 an L-arabinose concentration of 0.003% (orange box), no drastic decrease in survival was  
1244 observed in comparison to the sample grown in EZ glucose.

1245

## SI Appendix Figure 11

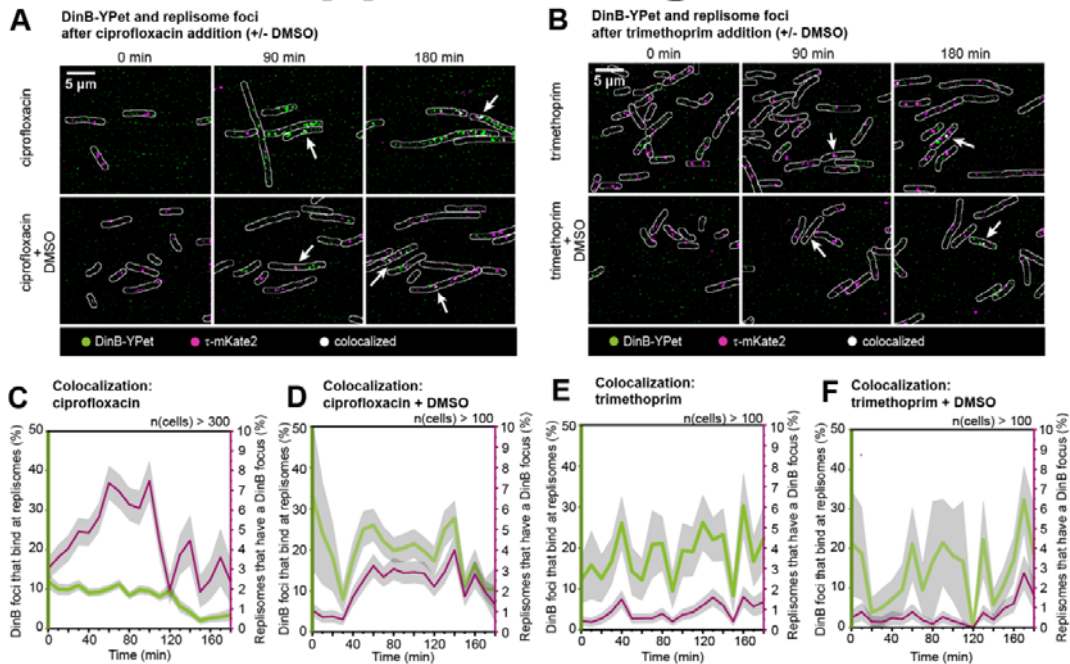

1246

1247

1248 **Fig. S11.** Measuring colocalization of pol IV with replisomes following ciprofloxacin or

1249 trimethoprim treatment in the absence or presence of ROS mitigators. (A) Merged images

1250 showing DinB-YPet (pol IV) foci in green and  $\tau$ -mKate2 (replisome) foci in magenta at 0, 90

1251 and 180 min (left to right) for ciprofloxacin-alone or ciprofloxacin-DMSO treatment (top to

1252 bottom). White arrows indicate colocalization events (white foci). Scale bar represents 5  $\mu$ m.

1253 (B) Merged images showing DinB-YPet (pol IV) foci in green and  $\tau$ -mKate2 (replisome) foci in

1254 magenta at 0, 90 and 180 min (left to right) for trimethoprim-alone or trimethoprim-DMSO

1255 treatment (top to bottom). White arrows indicate colocalization events (white foci). Scale bar

1256 represents 5  $\mu$ m. (C) Colocalization measurements following ciprofloxacin-alone treatment

1257 over 180 min: percentage of pol IV foci that are bound at replisomes (green line), percentage

1258 of replisomes that contain a pol IV focus (magenta line). Grey shaded error bands represent

1259 the standard error of the mean from six biological replicates together. Measurements are

1260 from >300 cells per time point. (D) Colocalization measurements following ciprofloxacin-

1261 DMSO treatment over 180 min: percentage of pol IV foci that are bound at replisomes (green

1262 line), percentage of replisomes that contain a pol IV focus (magenta line). Grey shaded error

1263 bands represent the standard error of the mean from four biological replicates together.

1264 Measurements are from >100 cells per time point. (E) Colocalization measurements

1265 following trimethoprim-alone treatment over 180 min: percentage of pol IV foci that are

1266 bound at replisomes (green line), percentage of replisomes that contain a pol IV focus

1267 (magenta line). Grey shaded error bands represent the standard error of the mean from

1268 three biological replicates together. Measurements are from >100 cells per time point. (F)

1269 Colocalization measurements following trimethoprim-DMSO treatment over 180 min:

1270 percentage of pol IV foci that are bound at replisomes (green line), percentage of replisomes

1271 that contain a pol IV focus (magenta line). Grey shaded error bands represent the standard

1272 error of the mean from three biological replicates together. Measurements are from >100

## SI Appendix Figure 12

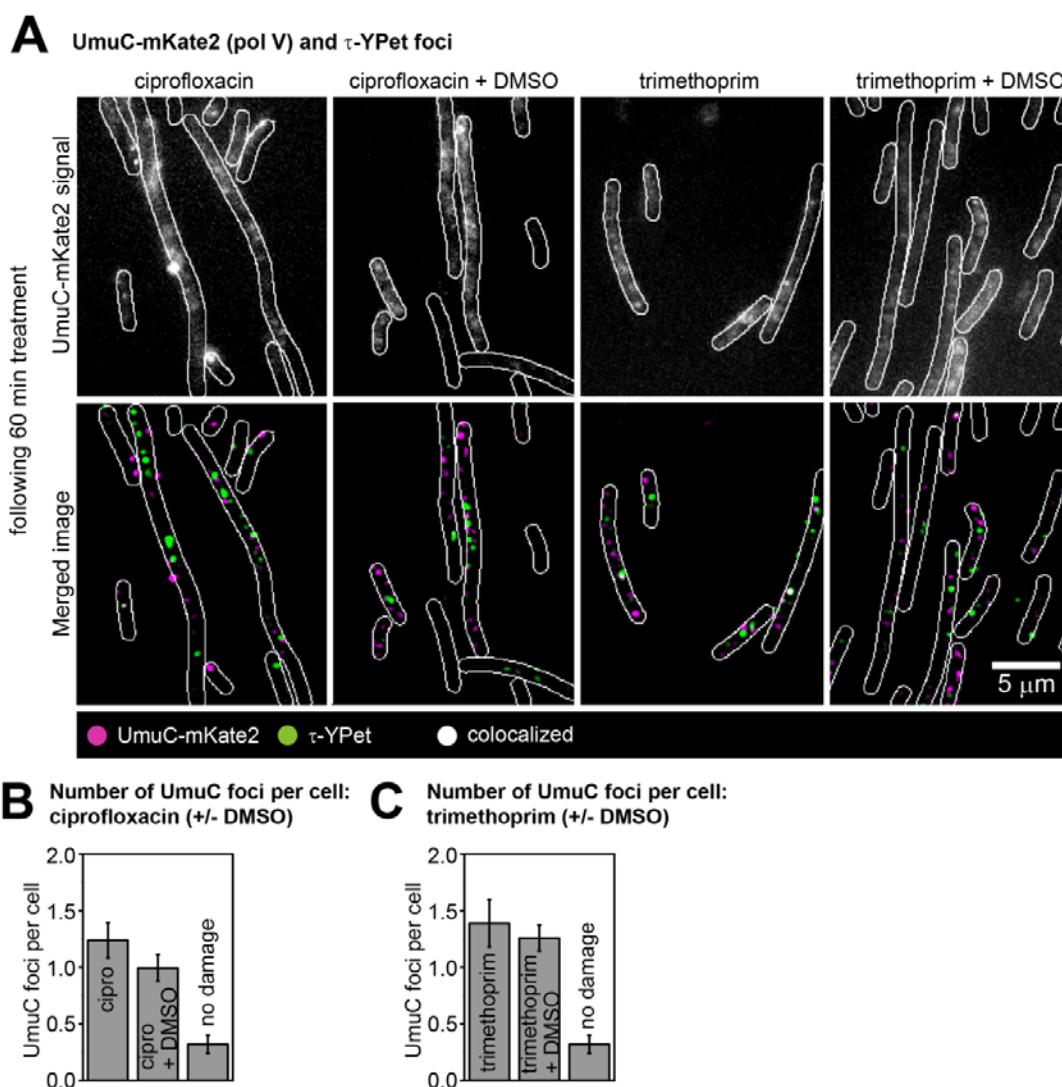

1273

1274

1275 **Fig. S12.** Measuring the number of pol V foci per cell following ciprofloxacin or trimethoprim

1276 treatment under normal conditions or ROS-scavenging conditions in *lexA(Def)* cells. (A)

1277 UmuC-mKate2 activity at replisomes in *lexA(Def)* cells. Cells were treated for 60 min prior to

1278 imaging. Upper row: unfiltered image of an average projection showing UmuC-mKate2 foci

1279 that last >1 s (from left to right: ciprofloxacin, ciprofloxacin-DMSO, trimethoprim,

1280 trimethoprim-DMSO). Bottom row: merged image showing UmuC-mKate2 foci in magenta

1281 and  $\tau$ -YPet foci in green (from left to right: ciprofloxacin, ciprofloxacin-DMSO, trimethoprim,

1282 trimethoprim-DMSO). Scale bar represents 5  $\mu$ m. (B) Number of UmuC-mKate2 foci per cell

1283 of foci that last > 1 s. Error bars represent standard error of the mean. Number of cells

1284 included in analysis:  $n(\text{ciprofloxacin}) = 97$ ,  $n(\text{ciprofloxacin-DMSO}) = 109$ ,  $n(\text{untreated}) = 87$ .

1285 (C) Binding behavior of UmuC-mKate2 at replisomes after ciprofloxacin-alone or

1286 ciprofloxacin-DMSO treatment. Mean average autocorrelation function (ciprofloxacin-alone:

1287 dark grey line, ciprofloxacin-DMSO: light grey line). Error bar represents standard error of

the mean. We conservatively estimate that >400 trajectories from >400 replisomes were

1288 used in each measurement. (D) Number of UmuC-mKate2 foci per cell. Error bars represent  
1289 standard error of the mean. Number of cells included in analysis:  $n(\text{trimethoprim}) = 102$ ,  
1290  $n(\text{trimethoprim-DMSO}) = 120$ ,  $n(\text{untreated}) = 87$ . (E) Binding behavior of UmuC-mKate2 at  
1291 replisomes after trimethoprim-alone or trimethoprim-DMSO treatment. Mean average  
1292 autocorrelation function (trimethoprim-alone: magenta line, trimethoprim-DMSO: light  
1293 magenta line). Error bar represents standard error of the mean. We conservatively estimate  
1294 that >550 trajectories from >550 replisomes were used in each measurement.

1295



1296

## SI Appendix Figure 13

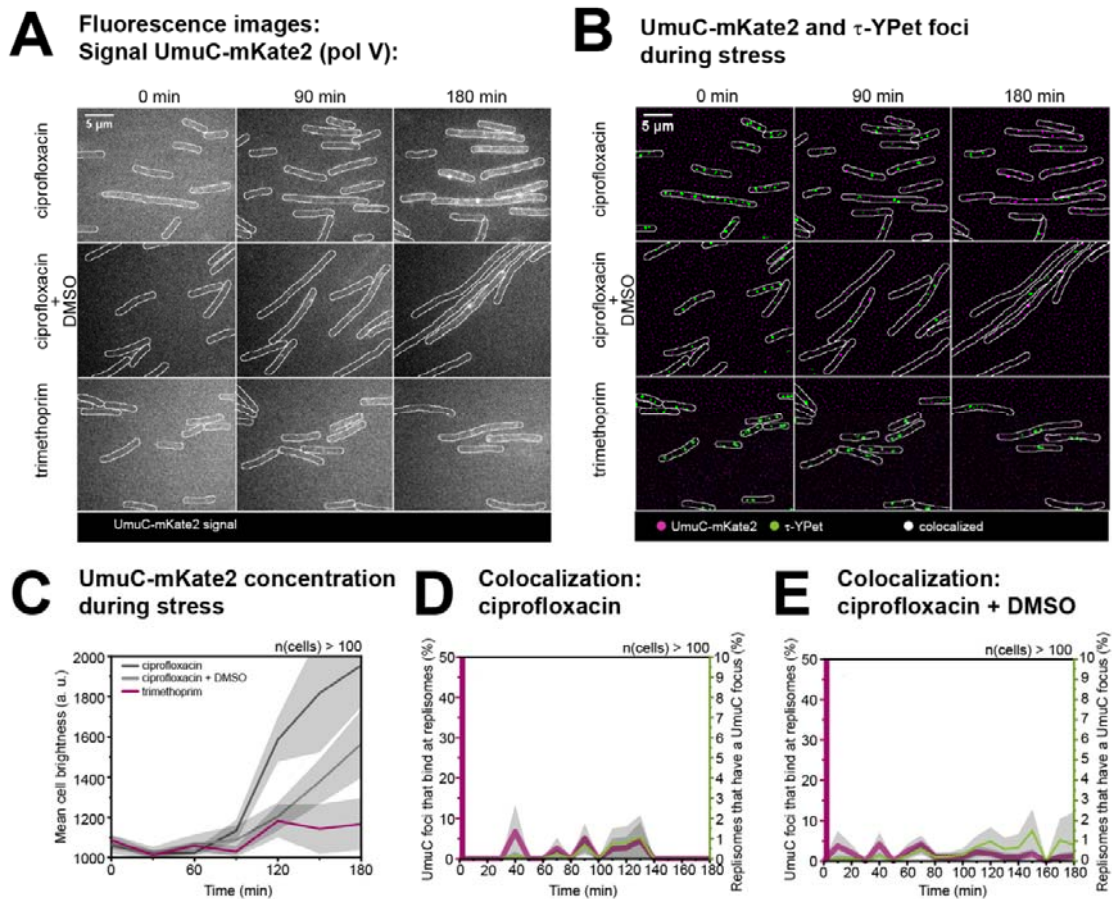

1297

1298 **Fig. S13.** UmuC concentration and activity following ciprofloxacin or trimethoprim treatment  
 1299 under normal conditions or ROS-scavenging conditions. (A) Images showing UmuC-mKate2  
 1300 (pol V) signal at 0, 90 and 180 min (left to right) for ciprofloxacin-alone, ciprofloxacin-DMSO  
 1301 treatment or trimethoprim-alone treatment (top to bottom). Scale bar represents 5  $\mu$ m. (B)  
 1302 Merged images showing UmuC-mKate2 (pol V) foci in magenta and  $\tau$ -YPet (replisome) foci  
 1303 in magenta at 0, 90 and 180 min (left to right). Colocalized foci would appear as white foci.  
 1304 Scale bar represents 5  $\mu$ m. (C) Concentration of UmuC-mKate2 during stress. Mean cell  
 1305 brightness is plotted against time (ciprofloxacin-alone: dark grey line, ciprofloxacin-DMSO:  
 1306 light grey line, trimethoprim-alone: magenta line). At each time-point, data are derived from  
 1307 >100 cells. Grey shaded error bands represent standard error of the mean. (D)  
 1308 Colocalization measurements following ciprofloxacin-alone treatment over 180 min:  
 1309 percentage of UmuC foci that are bound at replisomes (magenta line), percentage of  
 1310 replisomes that contain a UmuC focus (green line). Grey shaded error bands represent the  
 1311 standard error of the mean from three biological replicates together. Measurements are from  
 1312 >100 cells per time point. (E) Colocalization measurements following ciprofloxacin-DMSO  
 1313 treatment over 180 min: percentage of UmuC foci that are bound at replisomes (magenta  
 1314 line), percentage of replisomes that contain a UmuC focus (green line). Grey shaded error  
 1315 bands represent the standard error of the mean from three biological replicates together.  
 1316 Measurements are from >100 cells per time point.

1317

# SI Appendix Figure 14

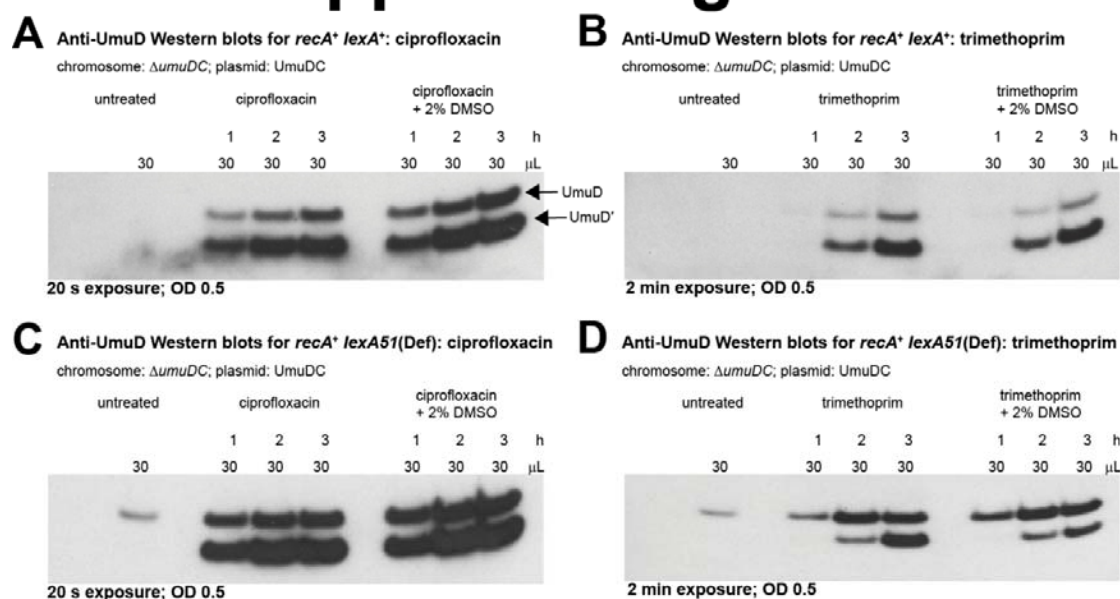

1318

1319 **Fig. S14.** Western blots with anti-UmuD antibodies measuring levels of UmuD $\square$ . For each  
1320 lane, 30  $\mu$ L of lysate were loaded from cultures at OD<sub>600</sub> 0.5. All strains used are  $\Delta umuDC$   
1321 expressing UmuDC from a low-copy number plasmid (pRW154). After treatment, time points  
1322 were taken at 1, 2, 3 h. (A) Western blot of *recA<sup>+</sup> lexA<sup>+</sup>* cells (RW120): untreated, treated  
1323 with ciprofloxacin or ciprofloxacin + 2% DMSO. (B) Western blot of *recA<sup>+</sup> lexA<sup>+</sup>* cells:  
1324 untreated, treated with trimethoprim or trimethoprim + 2% DMSO. (C) Western blot of *recA<sup>+</sup>*  
1325 *lexA51(Def)* cells (RW546): untreated, treated with ciprofloxacin or ciprofloxacin + 2%  
1326 DMSO. (D) Western blot of *recA<sup>+</sup> lexA51(Def)* cells: untreated, treated with trimethoprim or  
1327 trimethoprim + 2% DMSO.

1328

1329 **Movie S1.** Time-lapse movie of  $\Delta recB$  cells carrying  $P_{sulA}$ -*gfp*. Ciprofloxacin (30 ng/mL) was  
1330 added to the media at  $t = 0$  min. An image was taken every 10 min over the period of 3 h.  
1331 Upper movie: bright-field, bottom movie: signal from GFP expression (level of SOS  
1332 induction).

1333 **Movie S2.** Burst acquisition movies of DinB-YPet in *recB*<sup>+</sup> cells treated with 1  $\mu$ g/mL  
1334 trimethoprim (trimethoprim,  $\pm$  DMSO) or 30 ng/mL ciprofloxacin ( $\pm$  DMSO),  $\Delta recB$  cells  
1335 treated with trimethoprim or ciprofloxacin. Movies were recorded 60 min after antibiotic  
1336 addition. Frames were taken every 0.1 s.

1337
